# Supplementary material for: Recyclable copper(i)-catalyzed cascade C–S and C–N bond formation between 2-iodoanilines and 2-bromobenzenethiols towards functionalized phenothiazines
Source: Royal Society of Chemistry journal article supplement (doi:10.1039/d4cy00888j), 2024-01-01
Supplement: d4cy00888j1.pdf [file d4cy00888j1.pdf]

## **Supporting Information for:**

### **Recyclable copper(I)-catalyzed cascade C–S and C–N bond formation between 2-iodoanilines and 2-bromobenzenethiols towards functionalized phenothiazines**

Yan Wang, Chengkai Luo, Li Wei,\* Mingzhong Cai\*

*School of Chemistry and Materials Science, Jiangxi Normal University, Nanchang, Jiangxi 330022, China*

E-mail: mzcai@jxnu.edu.cn; liwei@163.com

**Copies of NMR Spectra of Compounds 3a-3y**

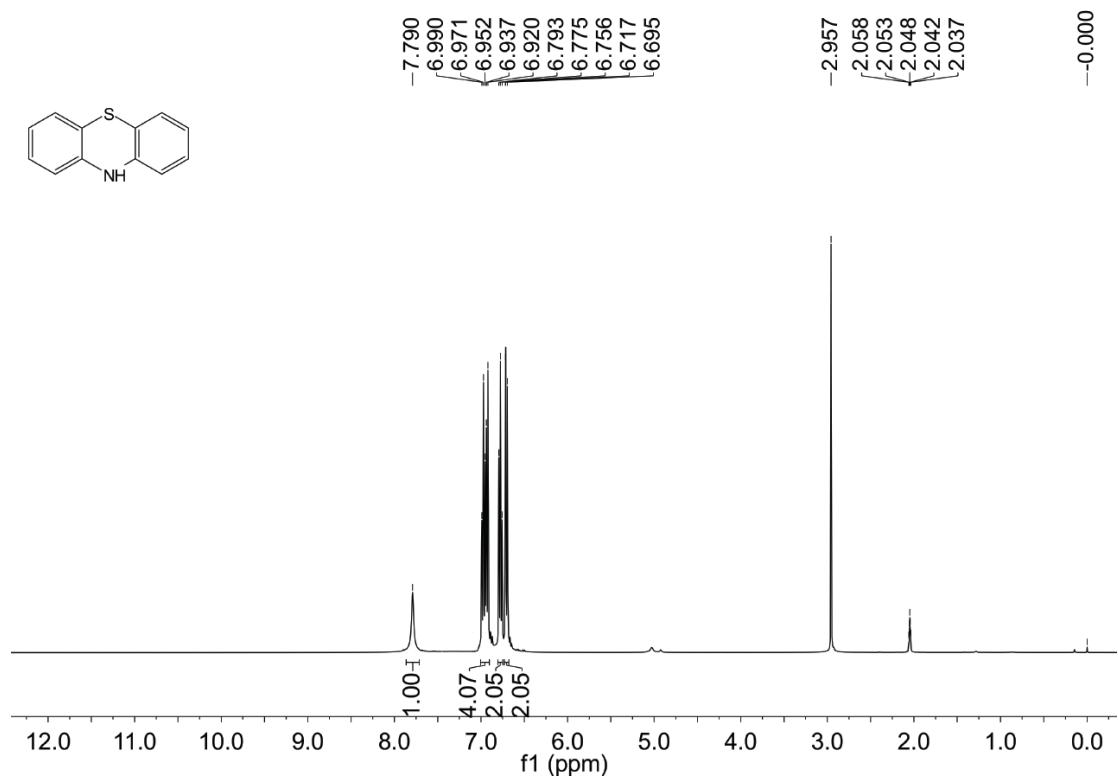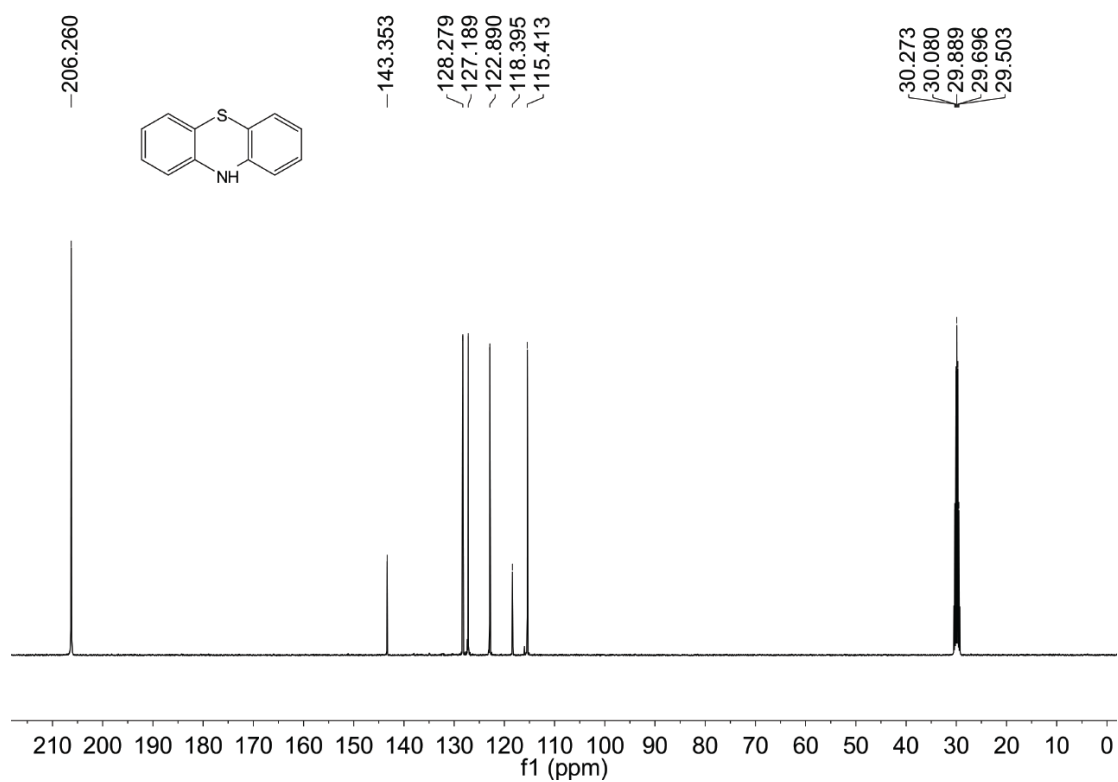

<sup>1</sup>H NMR and <sup>13</sup>C NMR of Compound **3a**

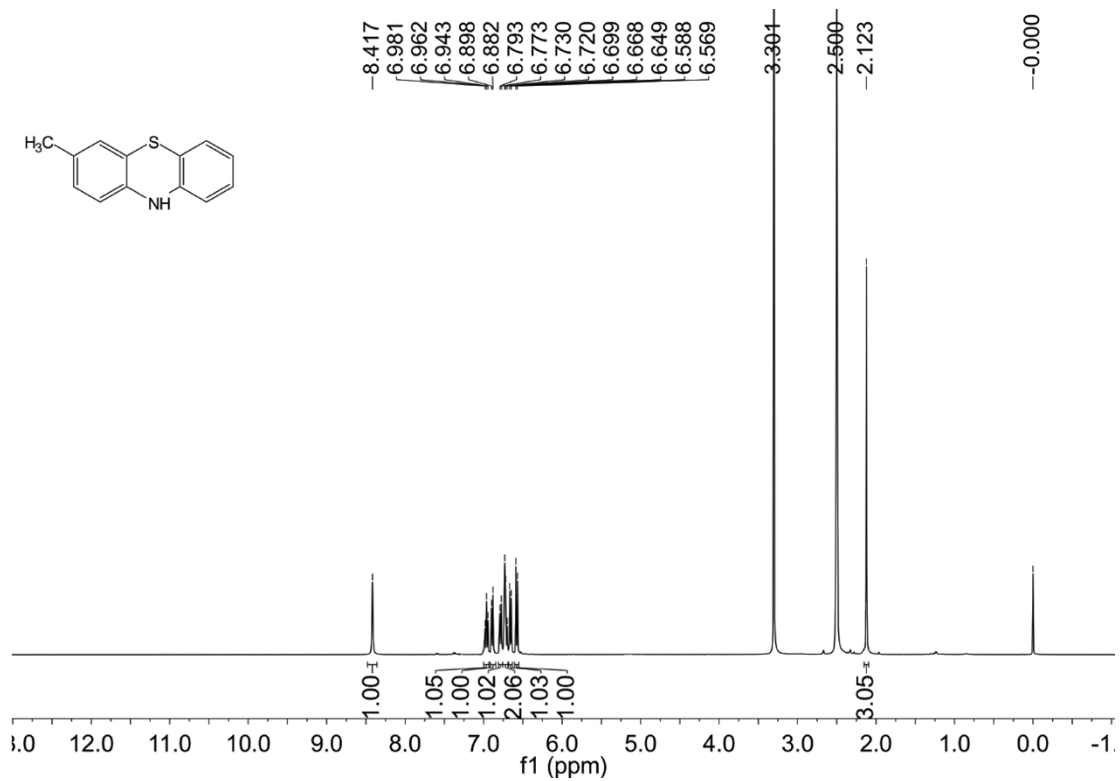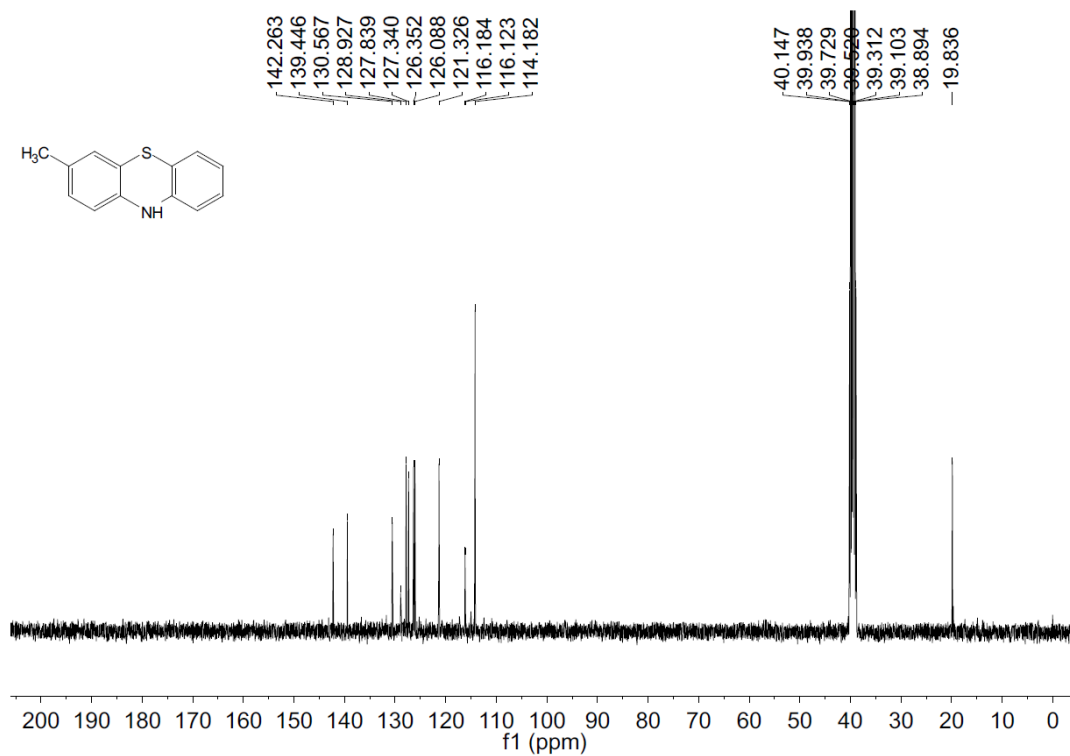

<sup>1</sup>H NMR and <sup>13</sup>C NMR of Compound **3b**

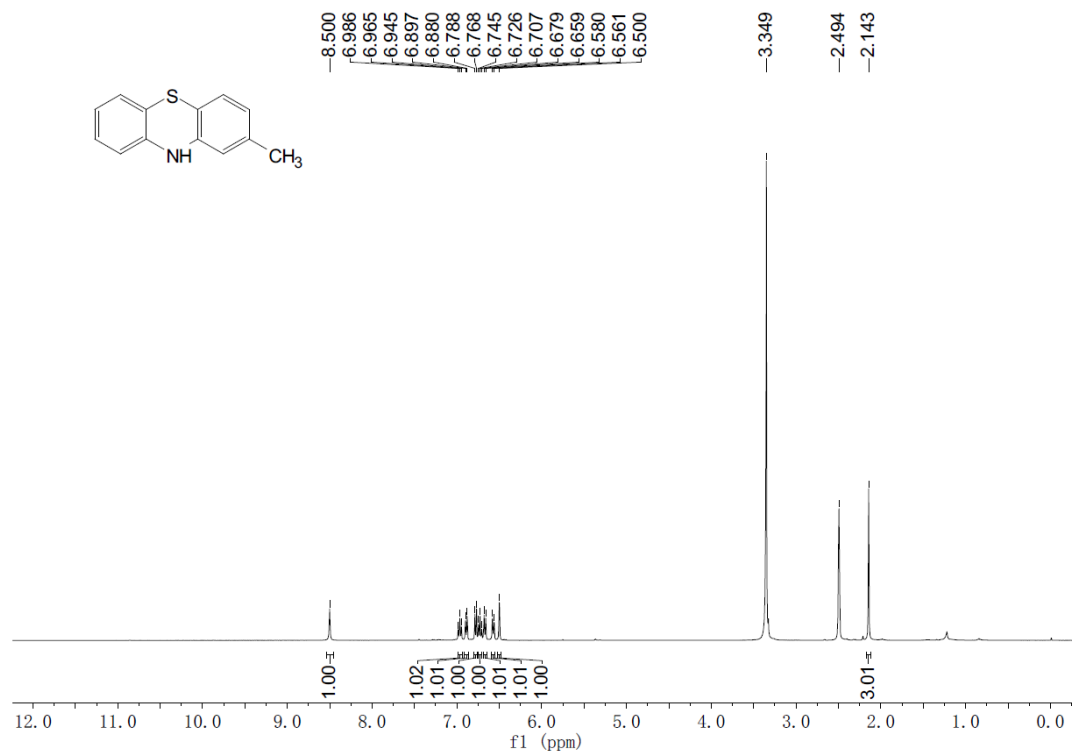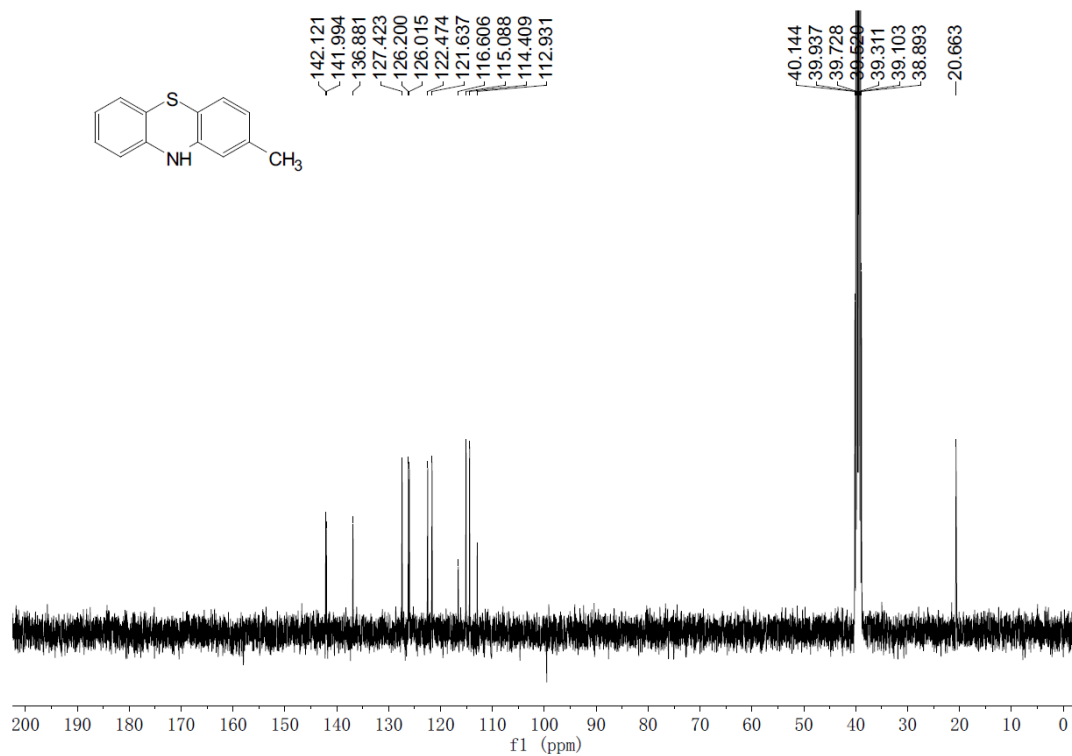

<sup>1</sup>H NMR and <sup>13</sup>C NMR of Compound **3c**

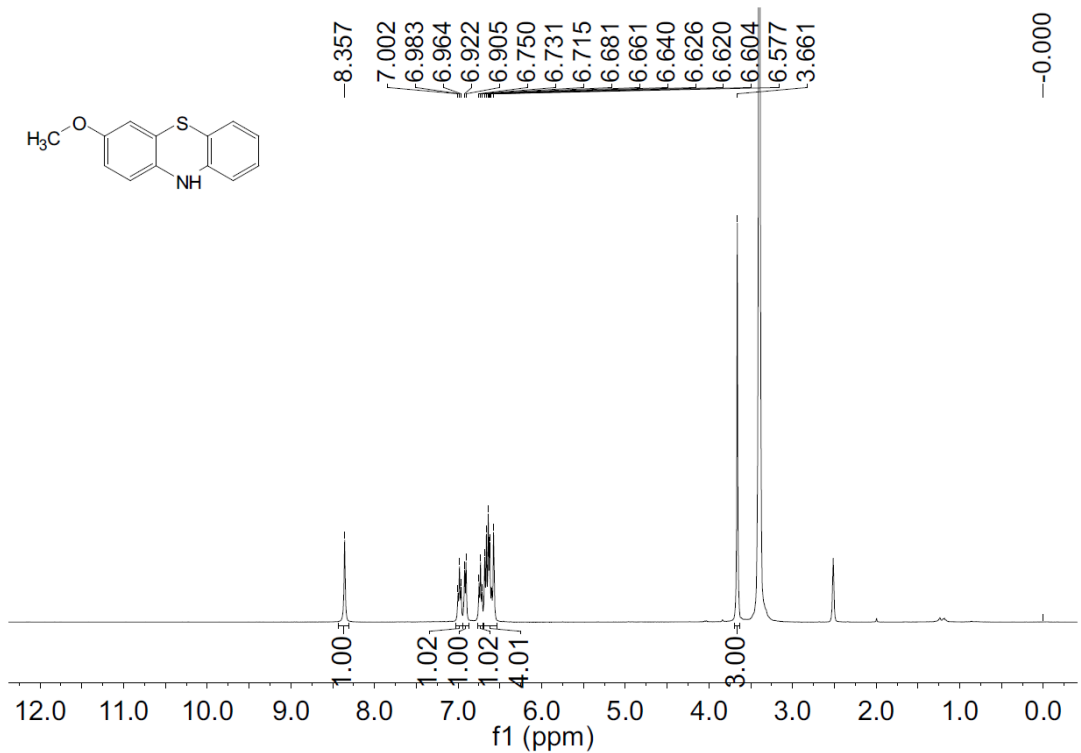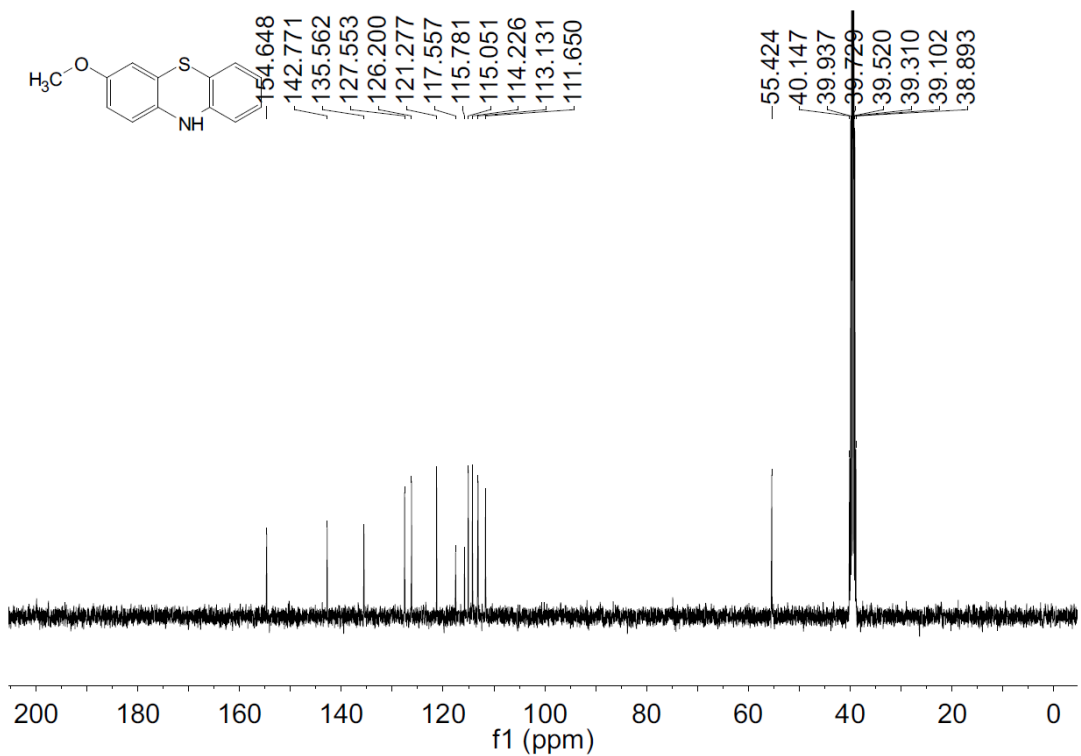

$^1\text{H NMR}$  and  $^{13}\text{C NMR}$  of Compound **3d**

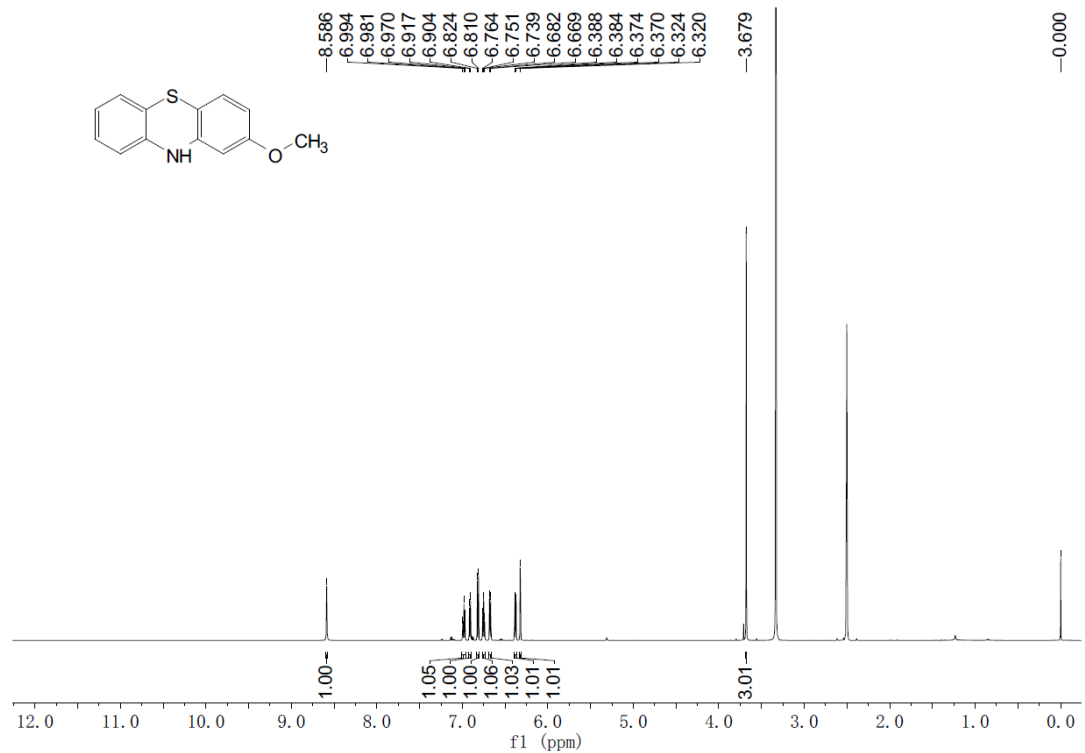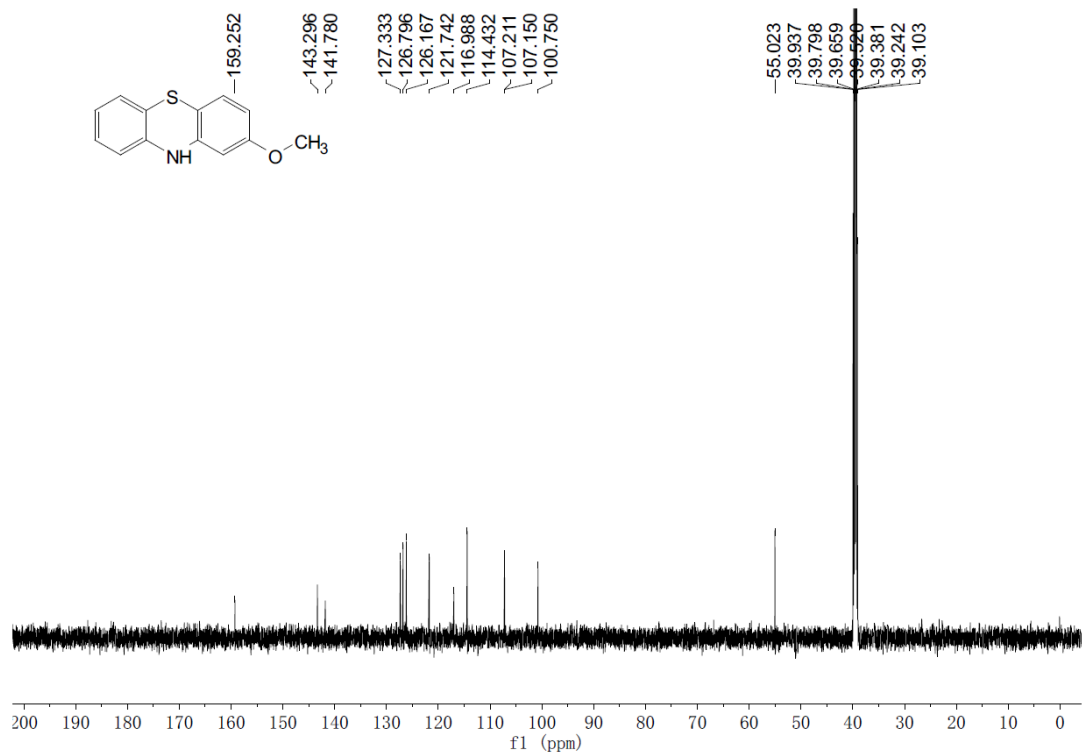

<sup>1</sup>H NMR and <sup>13</sup>C NMR of Compound **3e**

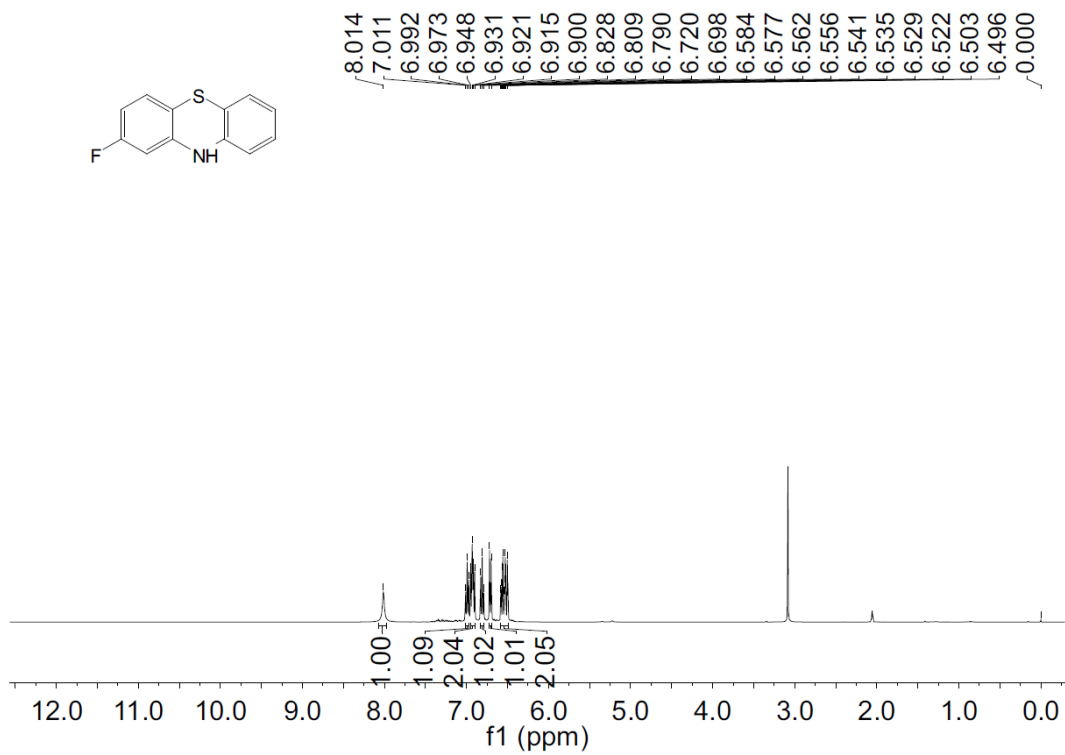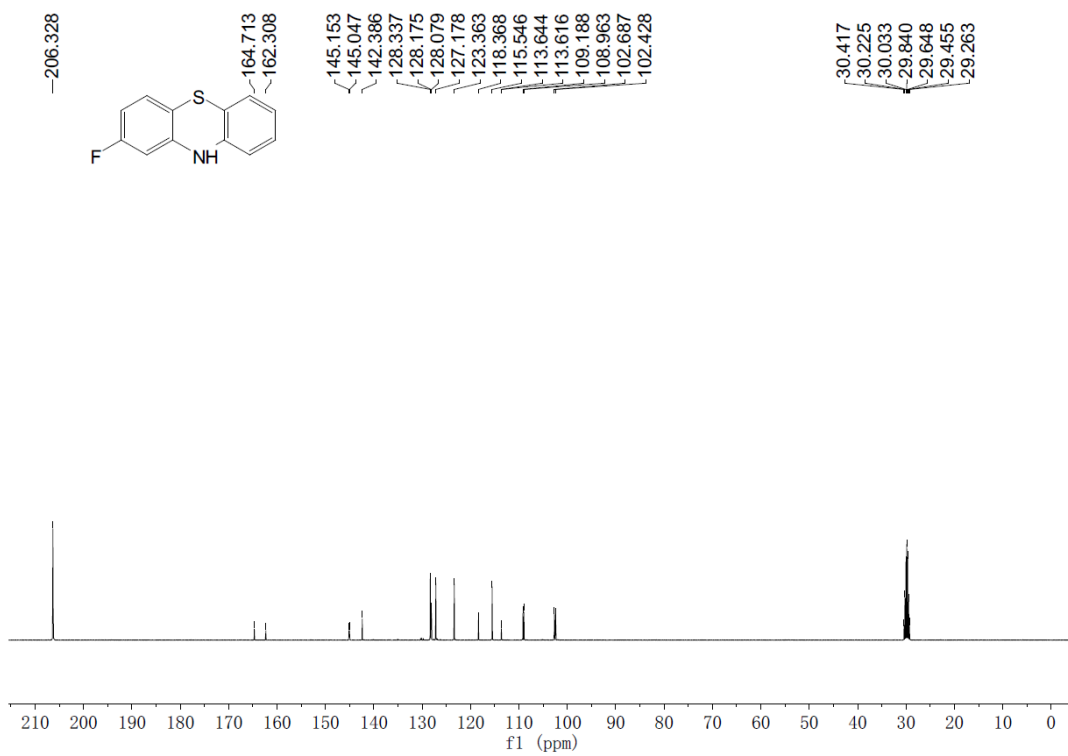

<sup>1</sup>H NMR and <sup>13</sup>C NMR of Compound **3f**

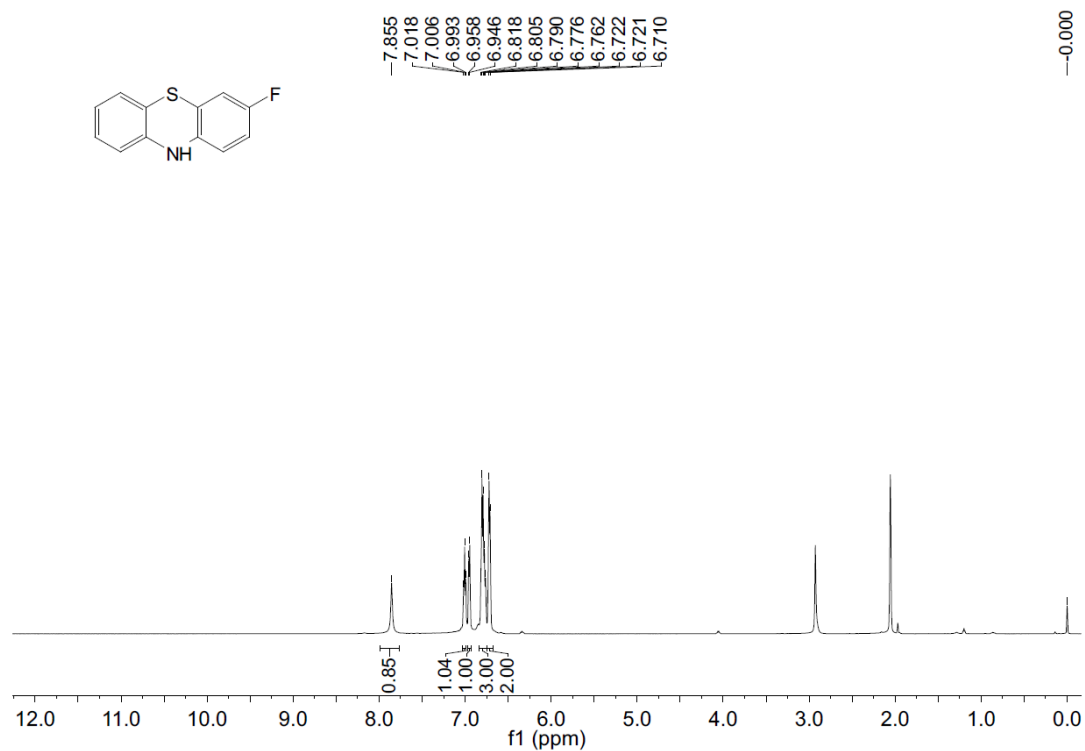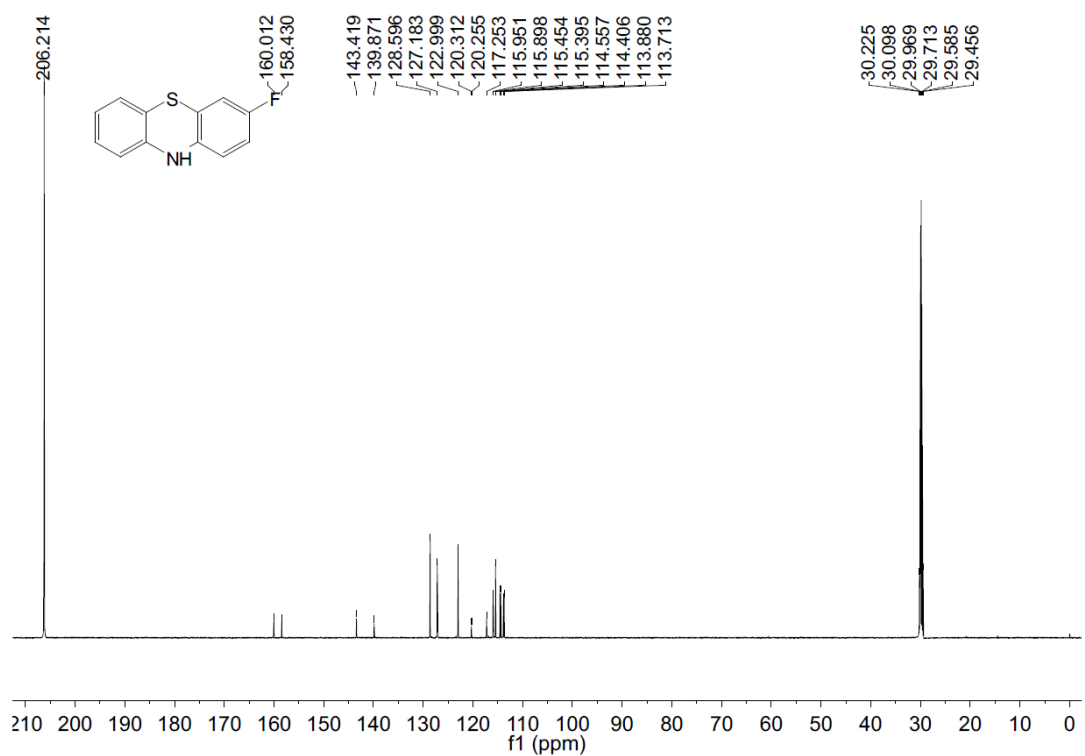

$^1\text{H}$  NMR and  $^{13}\text{C}$  NMR of Compound **3g**



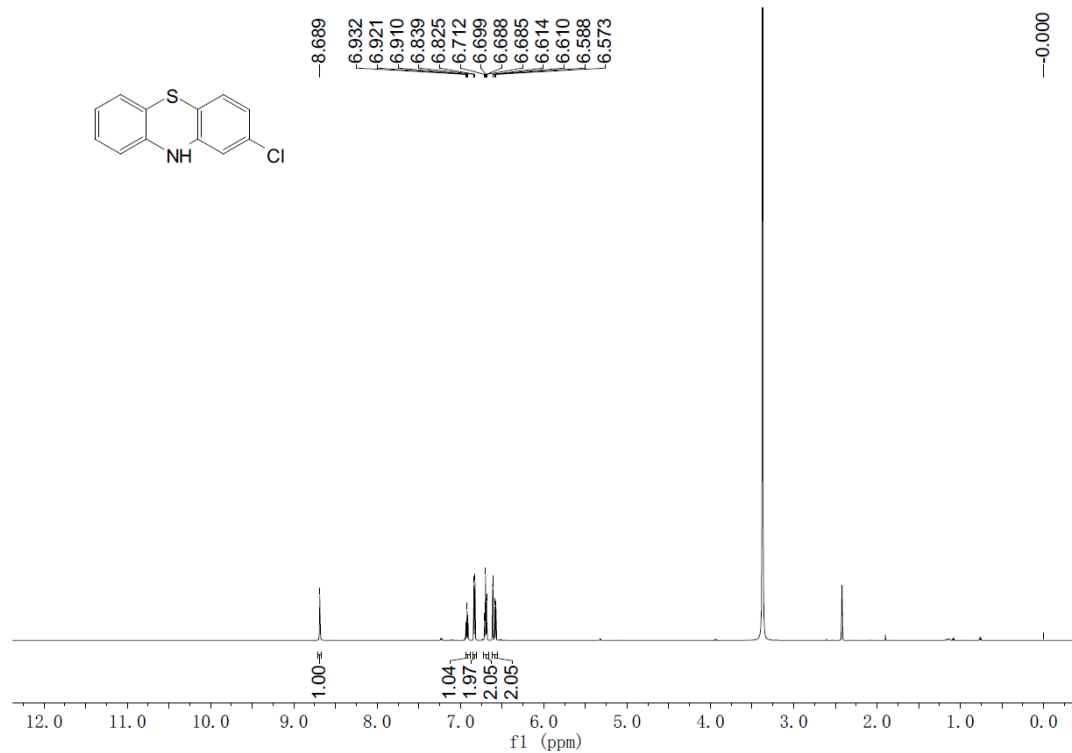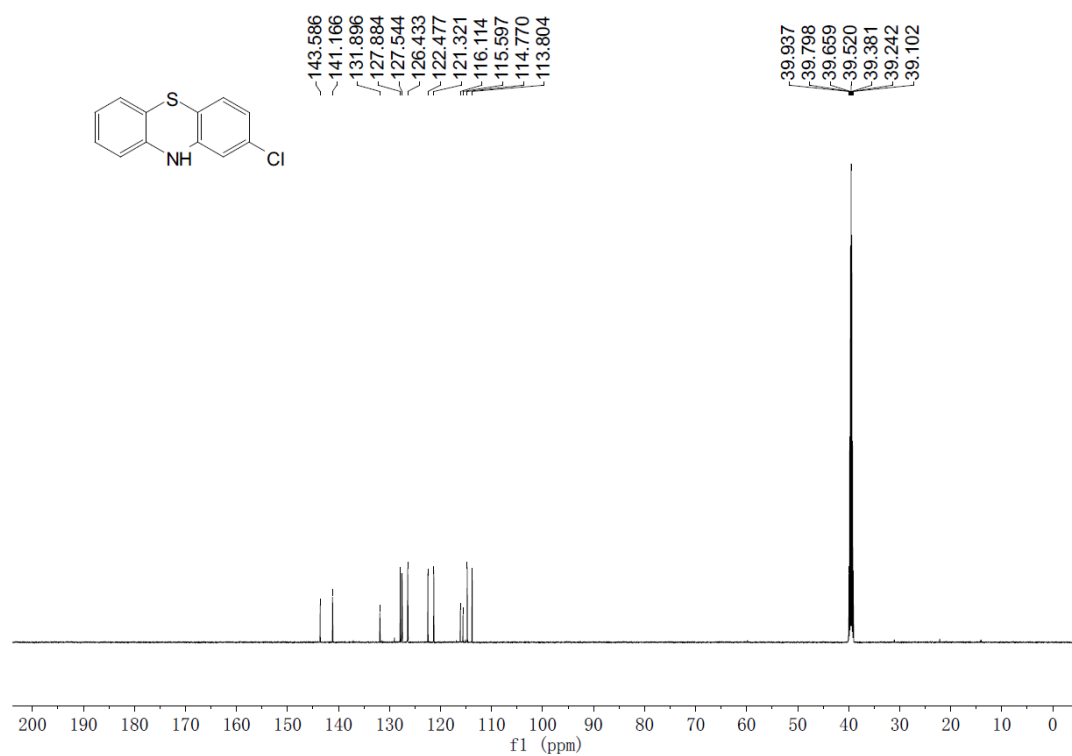

$^1\text{H}$  NMR and  $^{13}\text{C}$  NMR of Compound **3h**

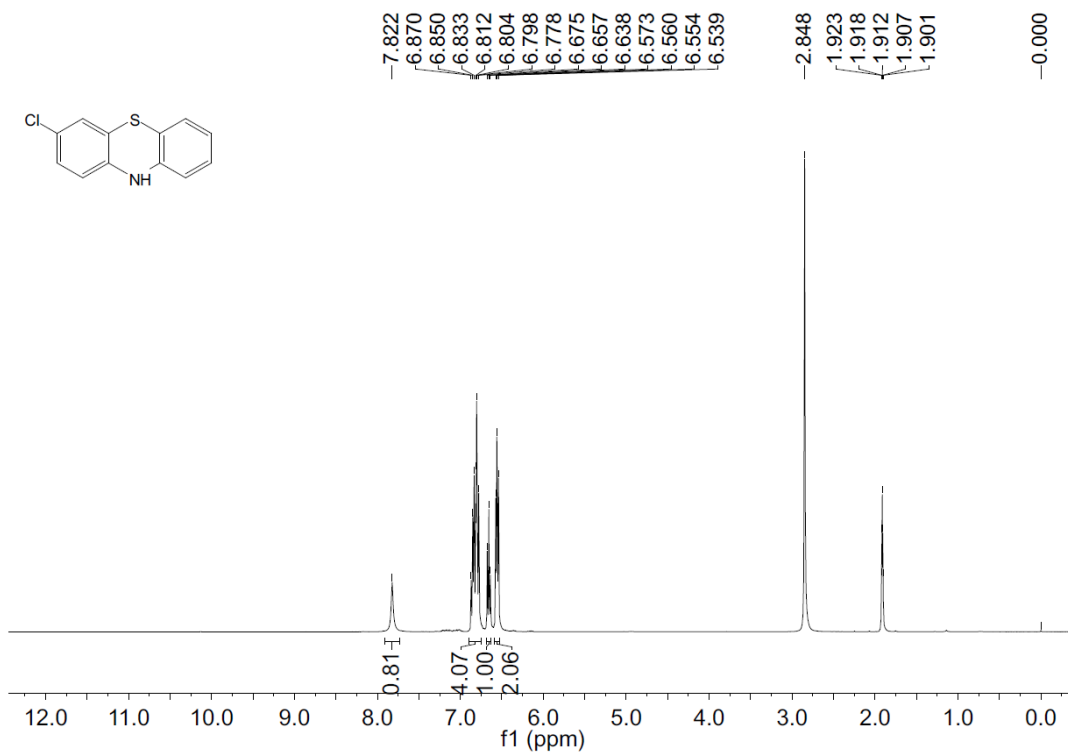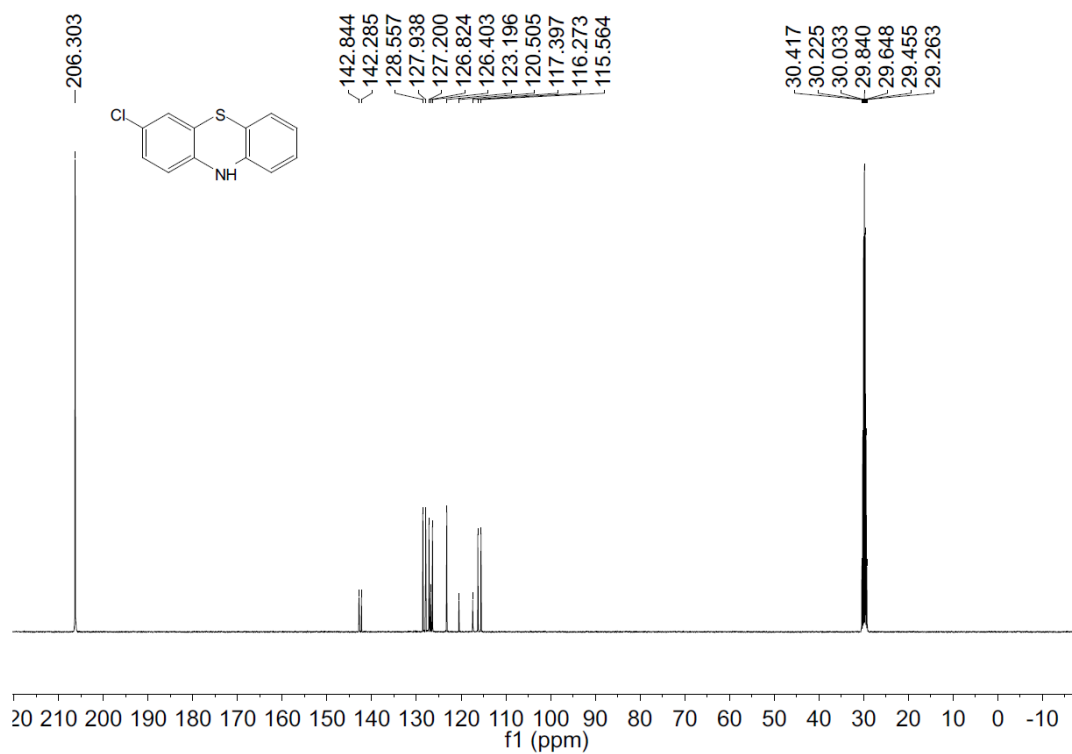

<sup>1</sup>H NMR and <sup>13</sup>C NMR of Compound **3i**

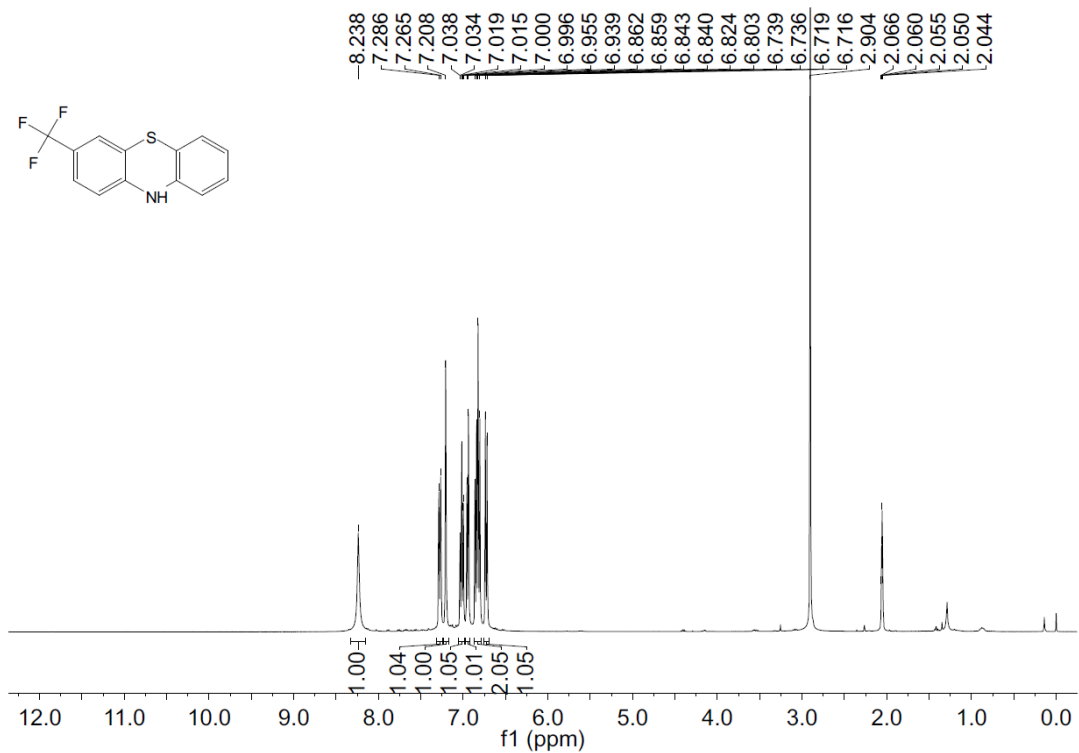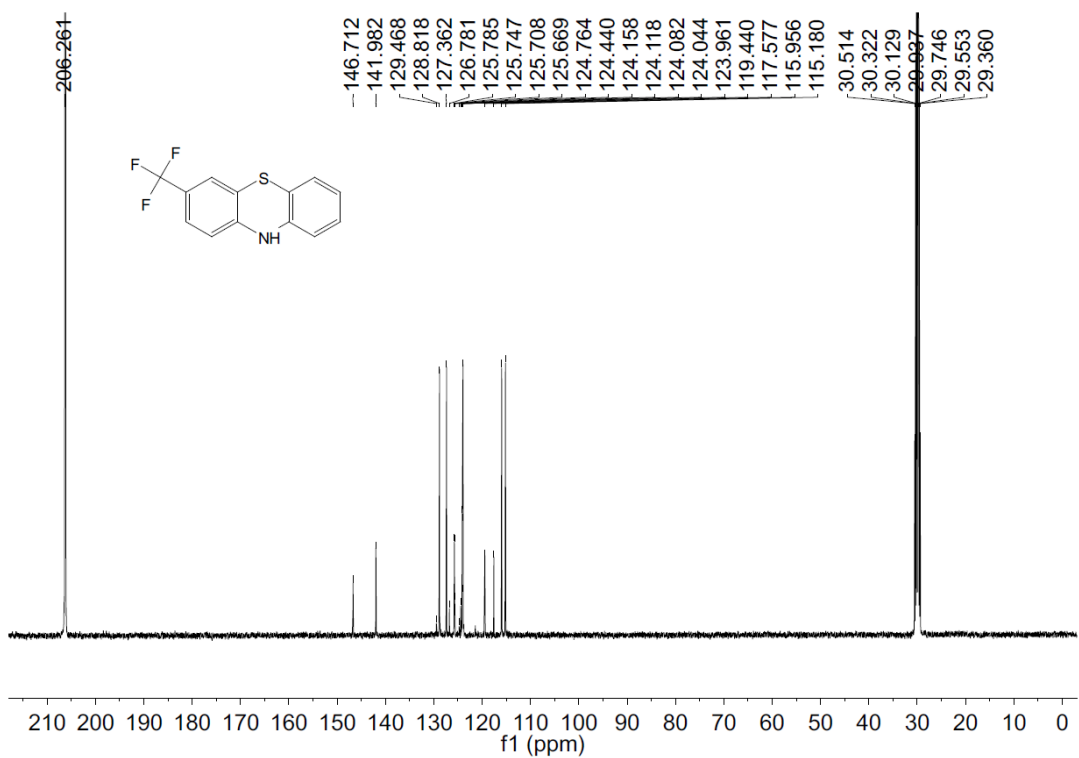

$^1\text{H}$  NMR and  $^{13}\text{C}$  NMR of Compound **3j**

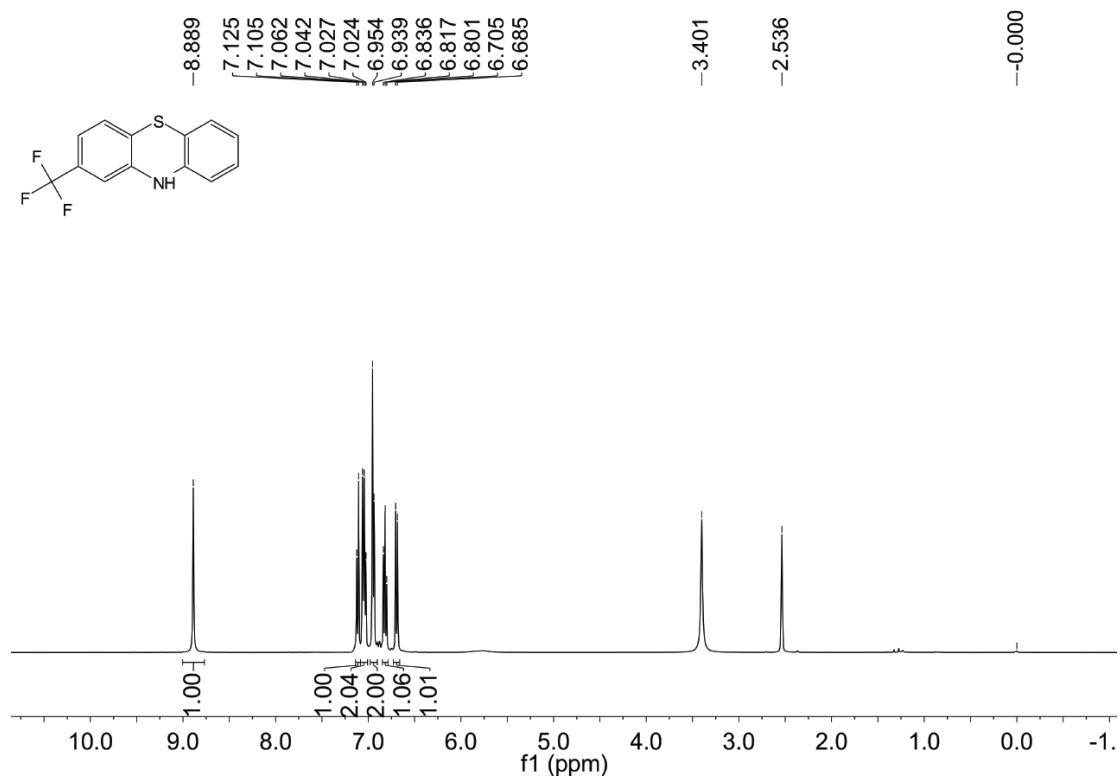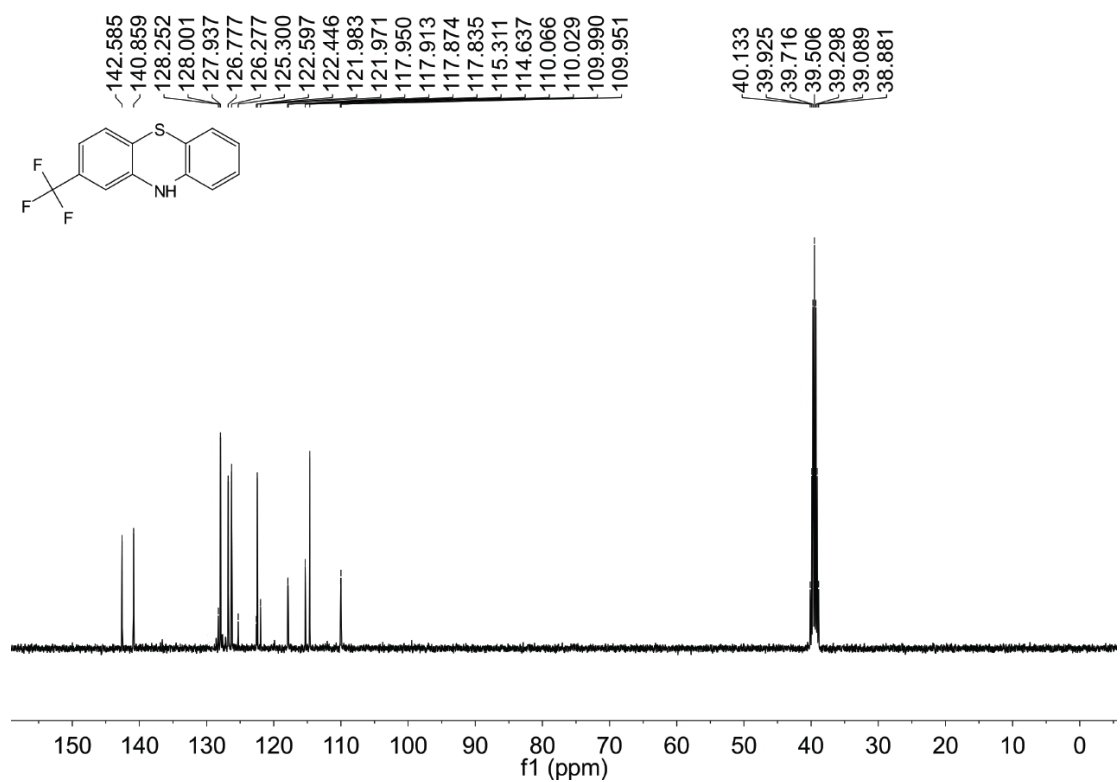

<sup>1</sup>H NMR and <sup>13</sup>C NMR of Compound **3k**

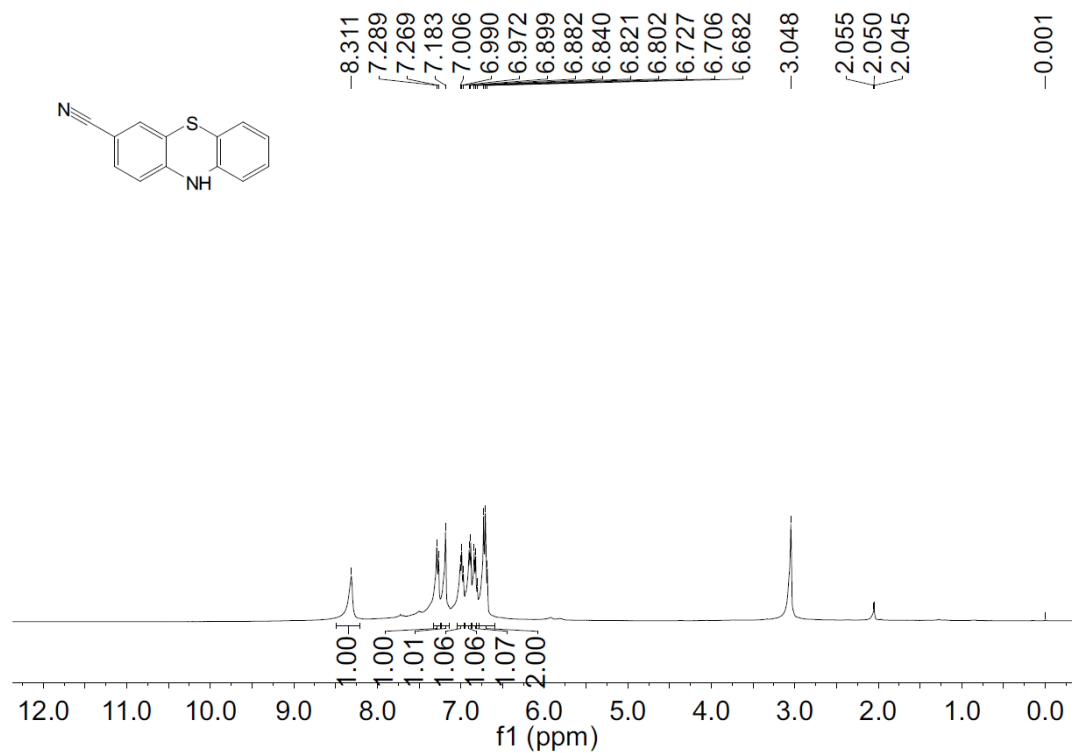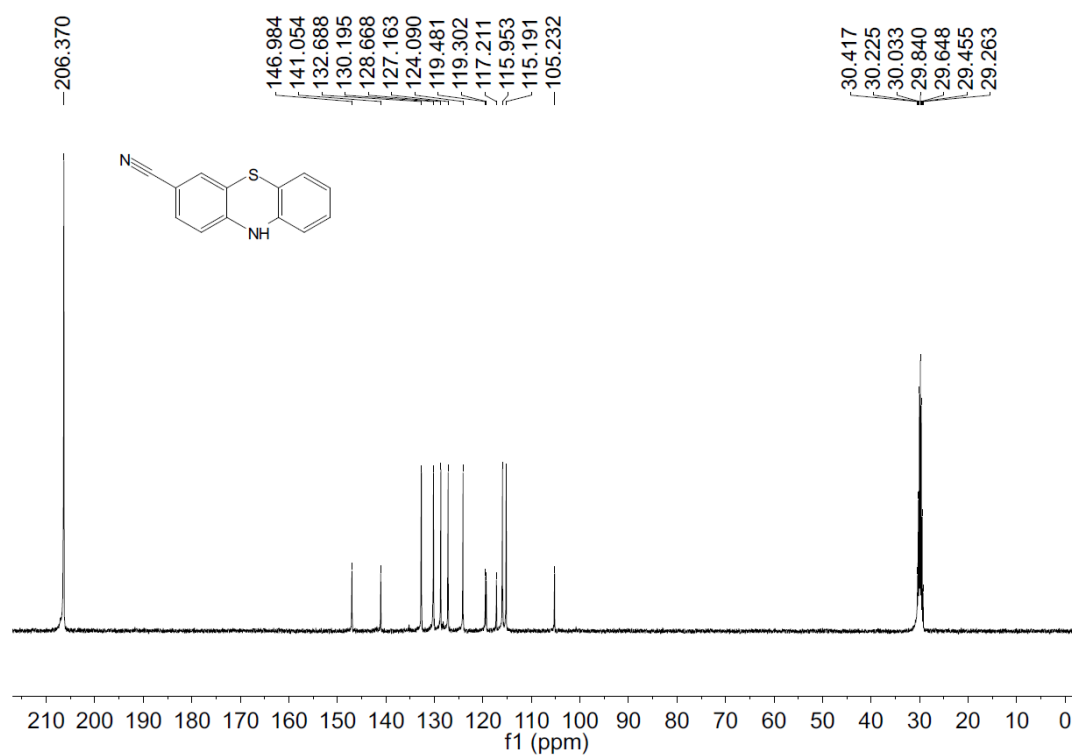

<sup>1</sup>H NMR and <sup>13</sup>C NMR of Compound **3I**

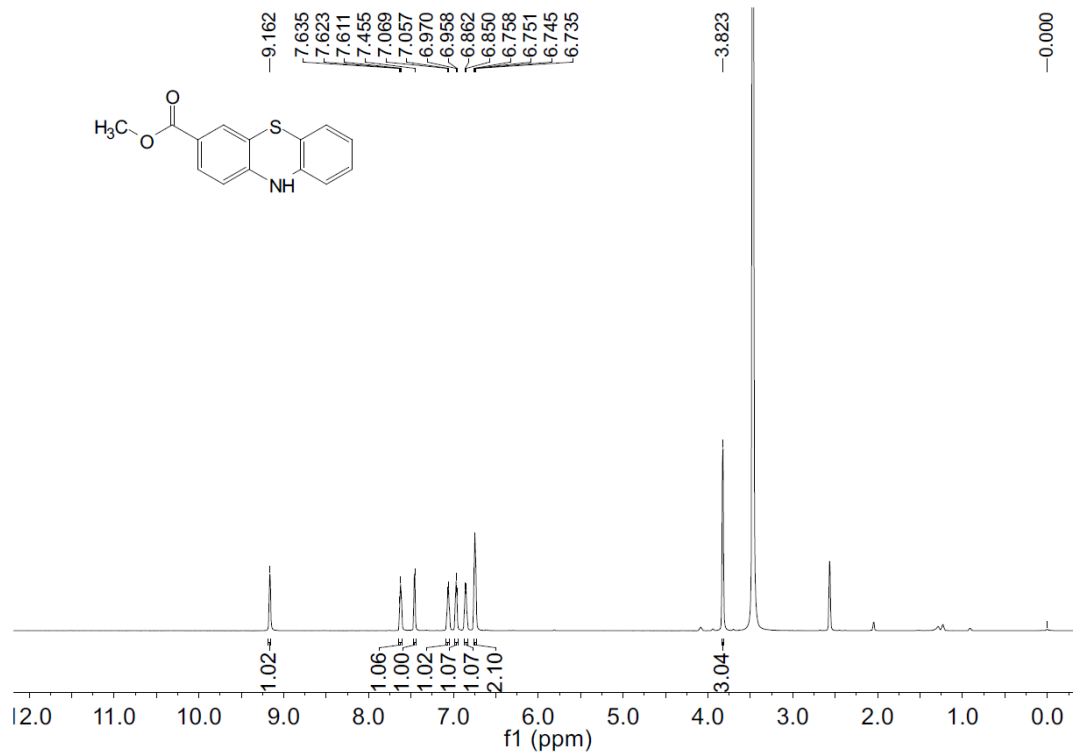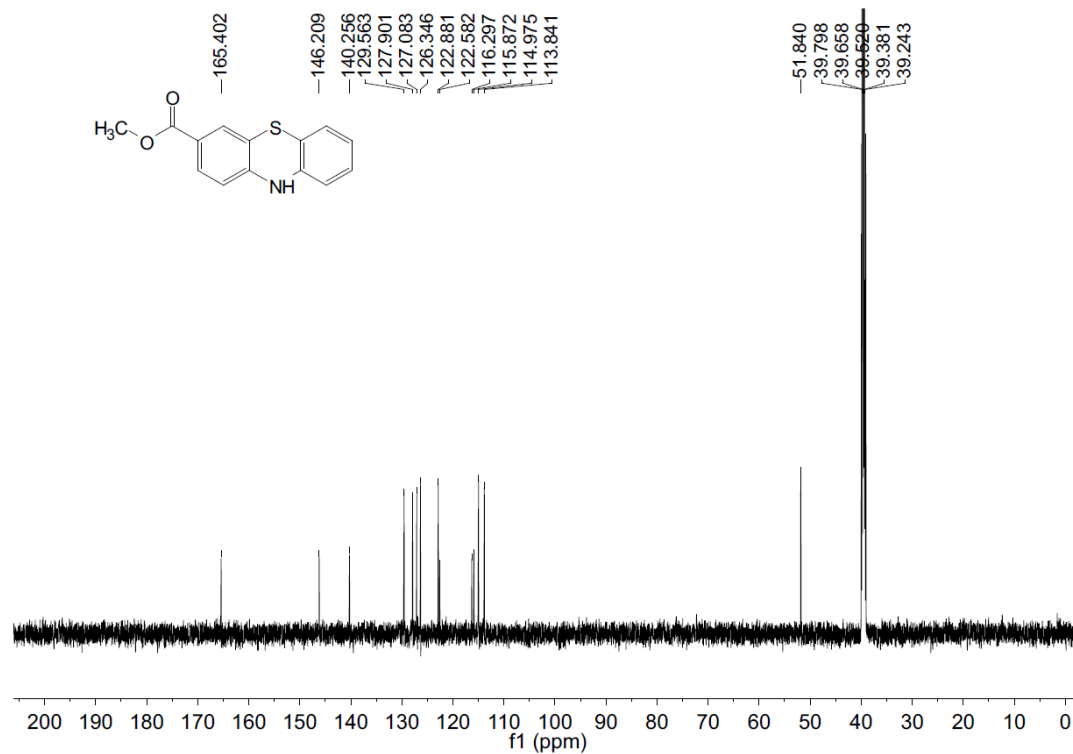

<sup>1</sup>H NMR and <sup>13</sup>C NMR of Compound **3m**

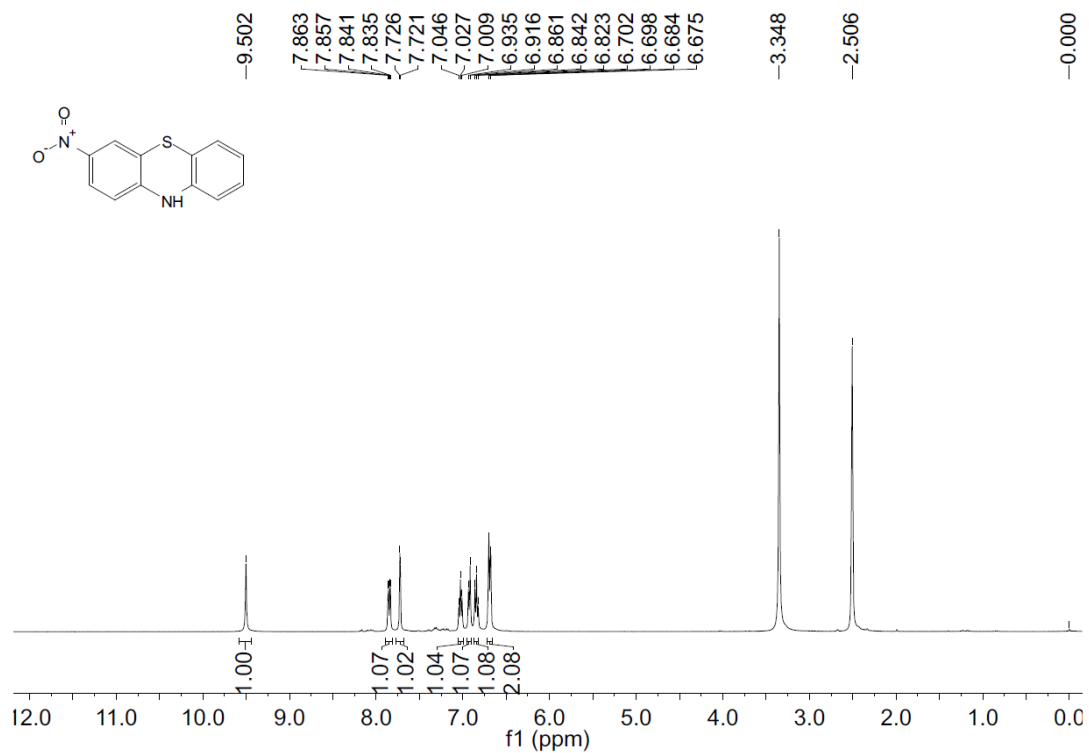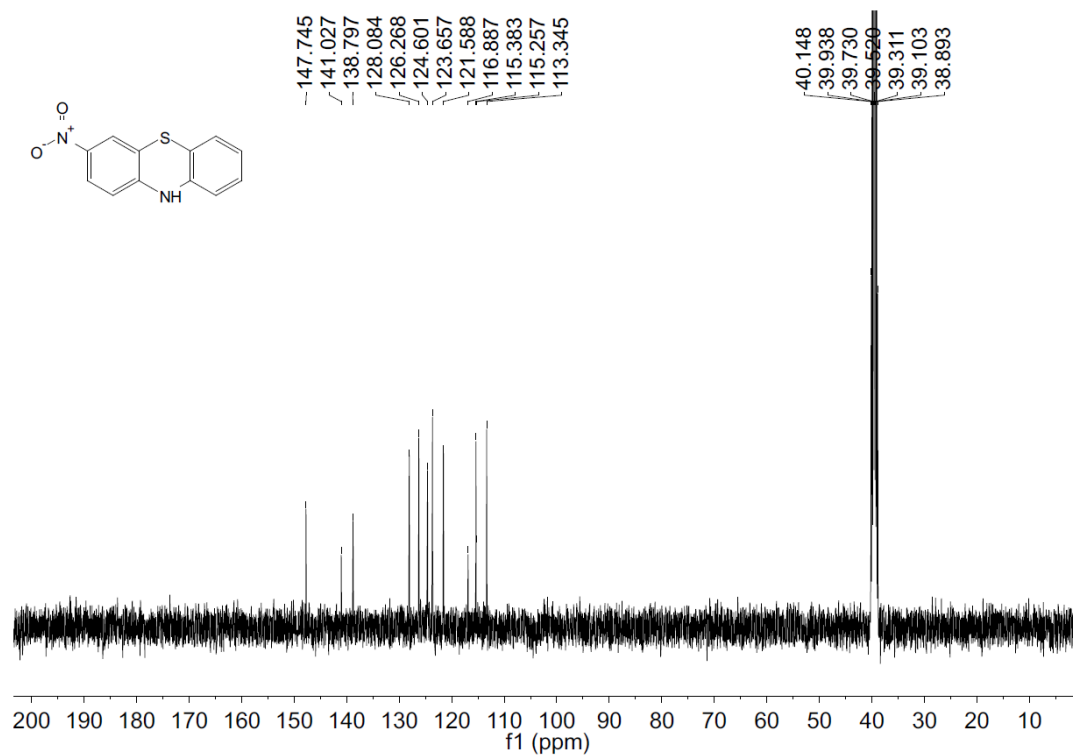

<sup>1</sup>H NMR and <sup>13</sup>C NMR of Compound **3n**

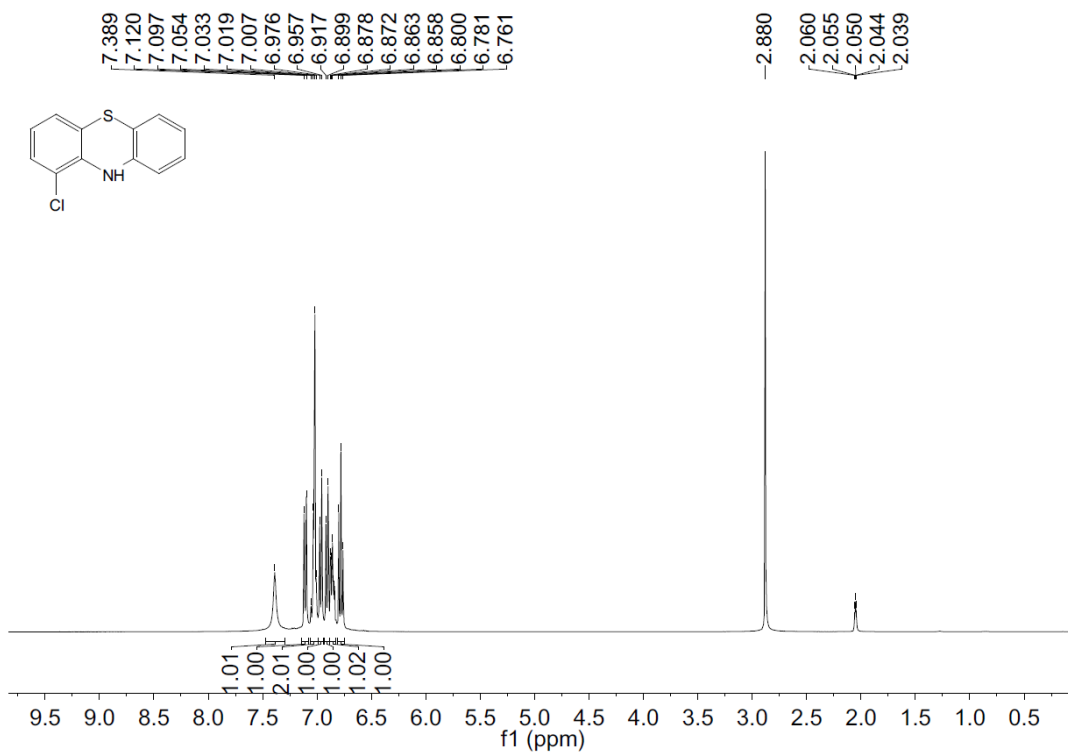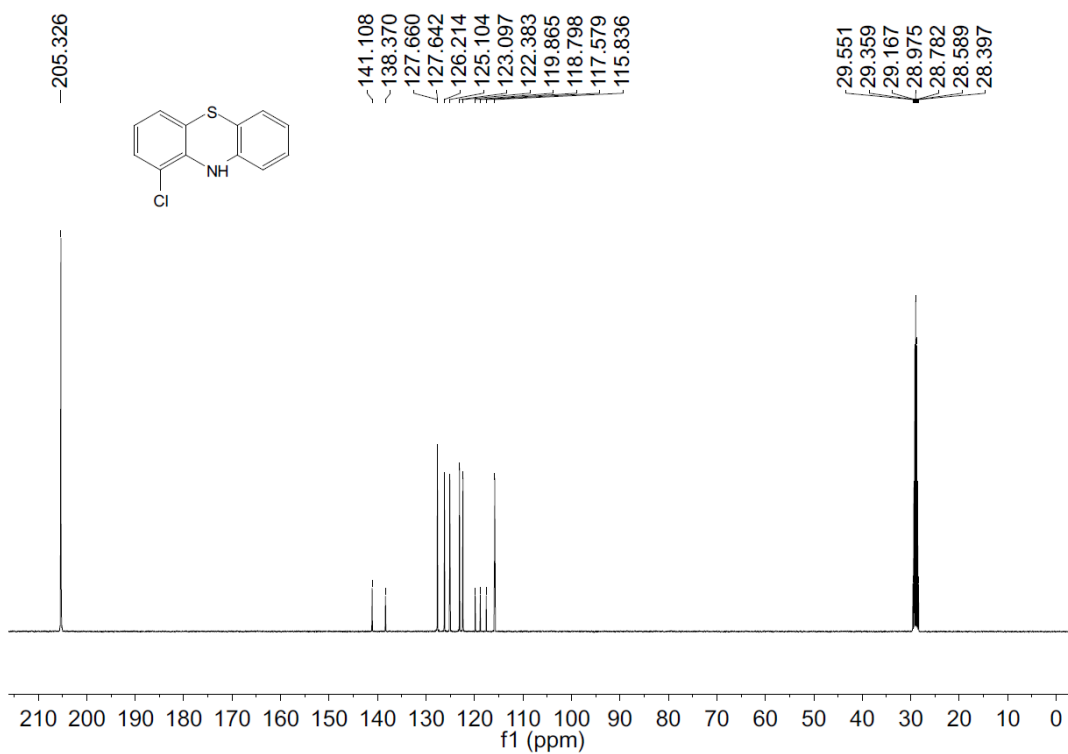

**<sup>1</sup>H NMR and <sup>13</sup>C NMR of Compound 30**



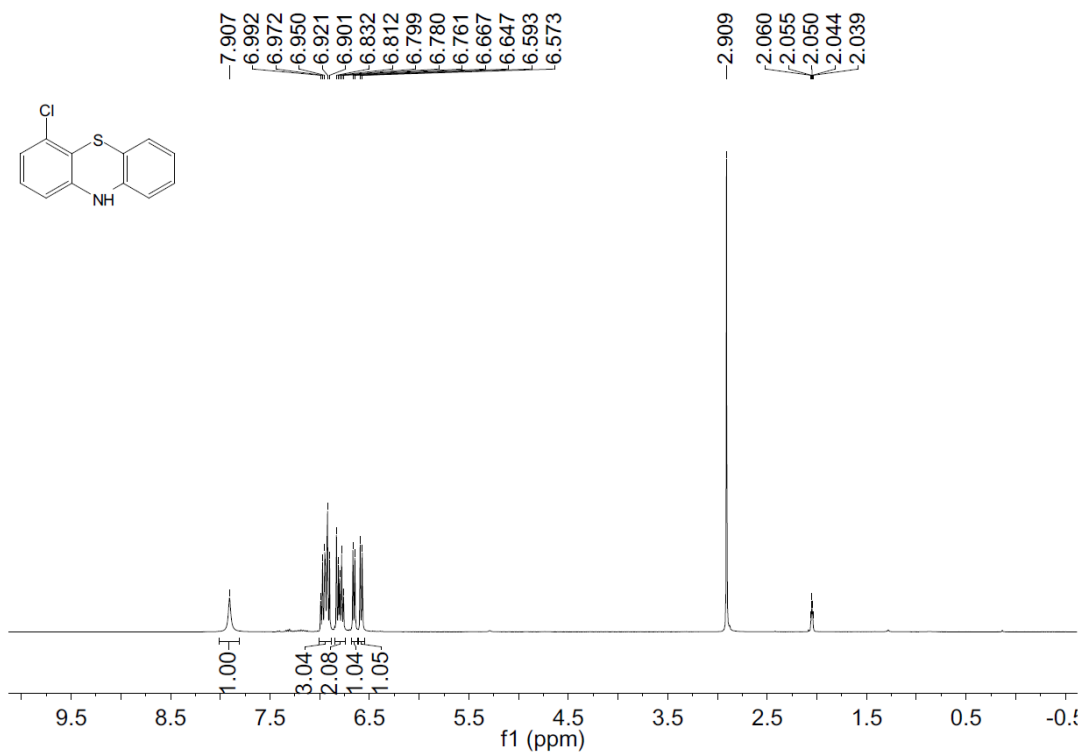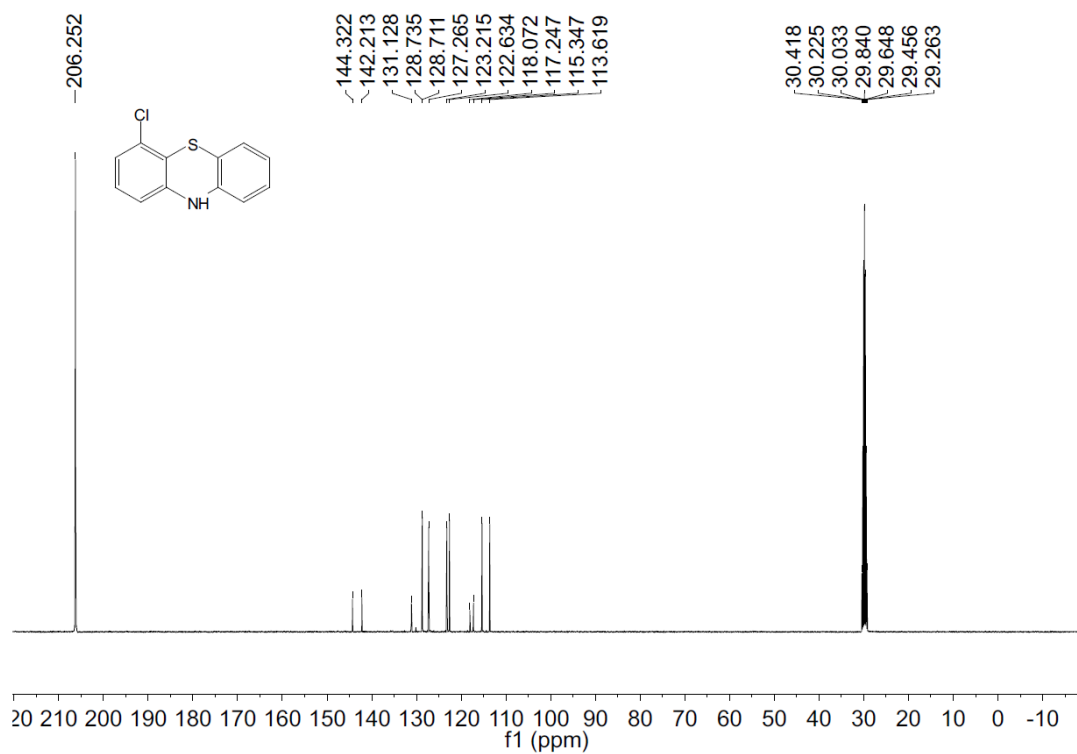

**<sup>1</sup>H NMR and <sup>13</sup>C NMR of Compound 3p**

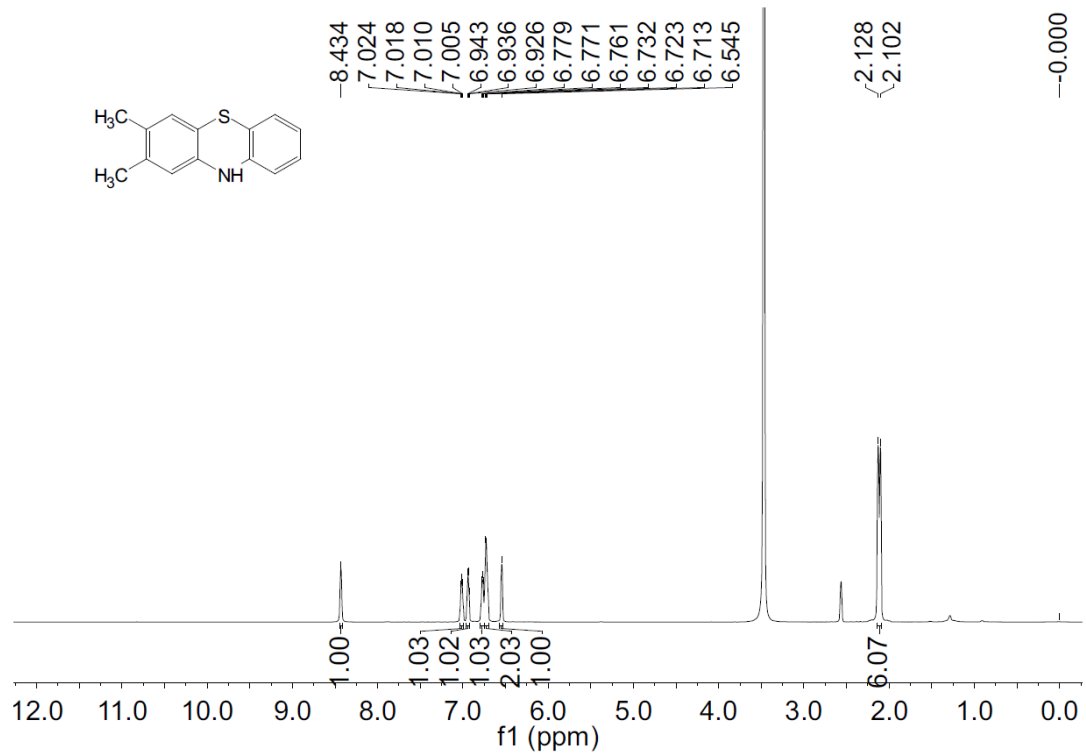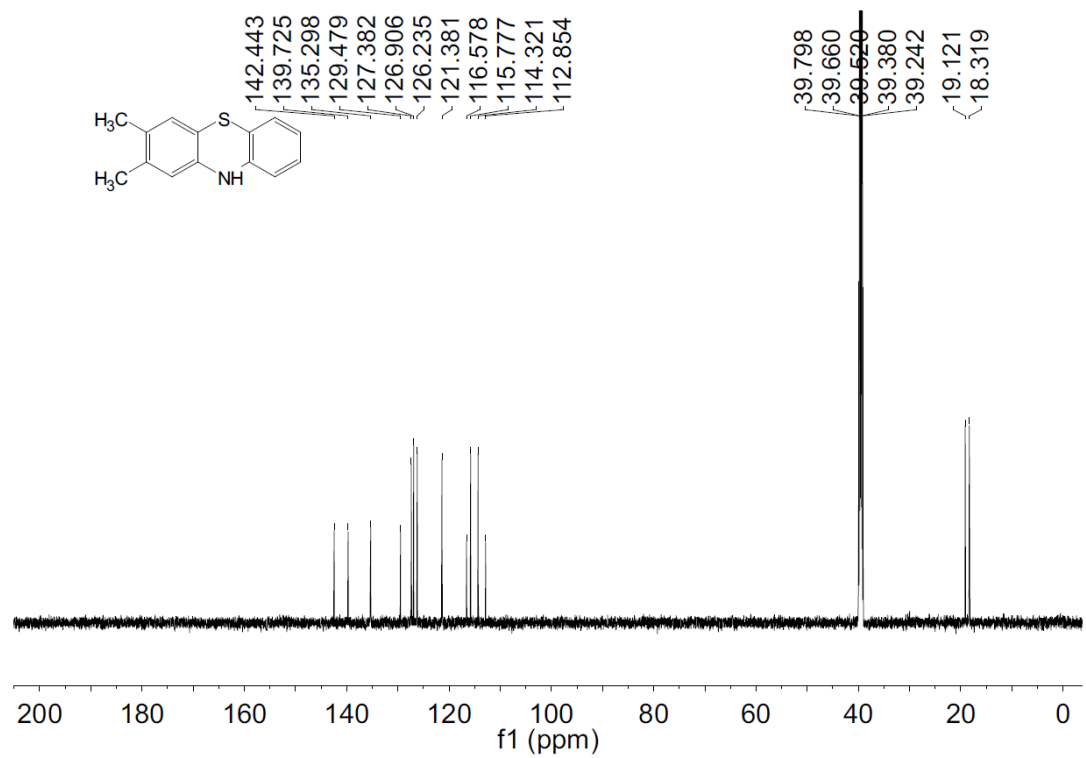

$^1\text{H NMR}$  and  $^{13}\text{C NMR}$  of Compound **3q**

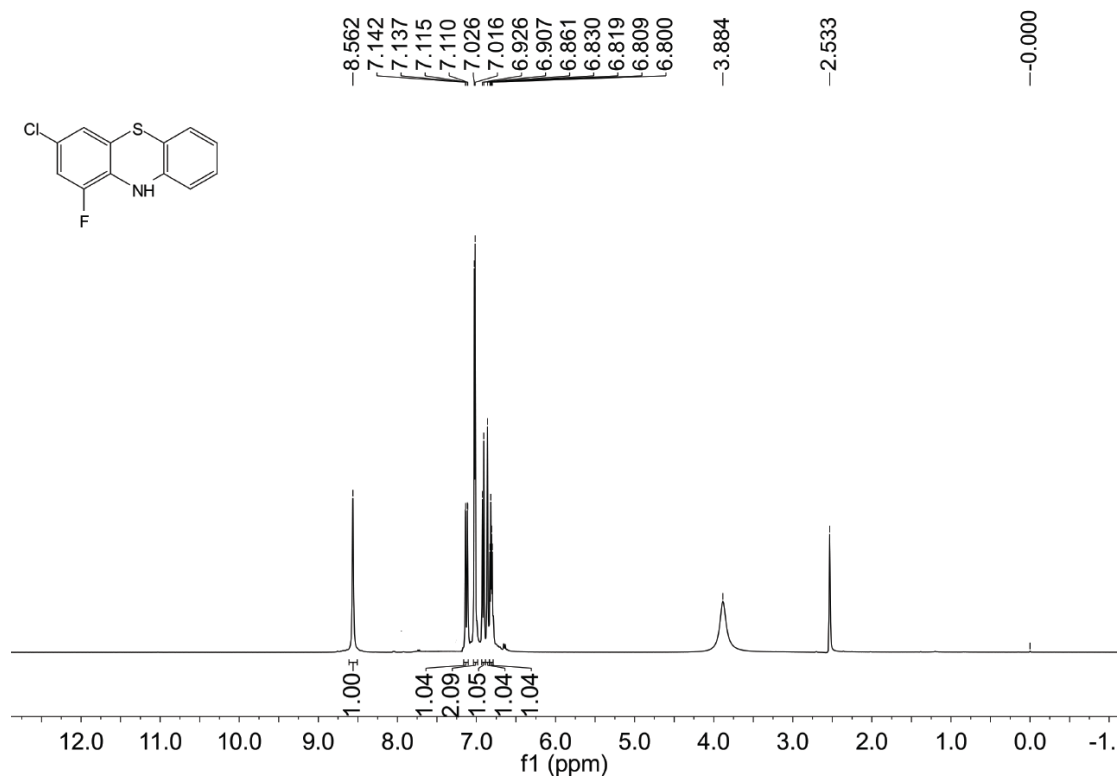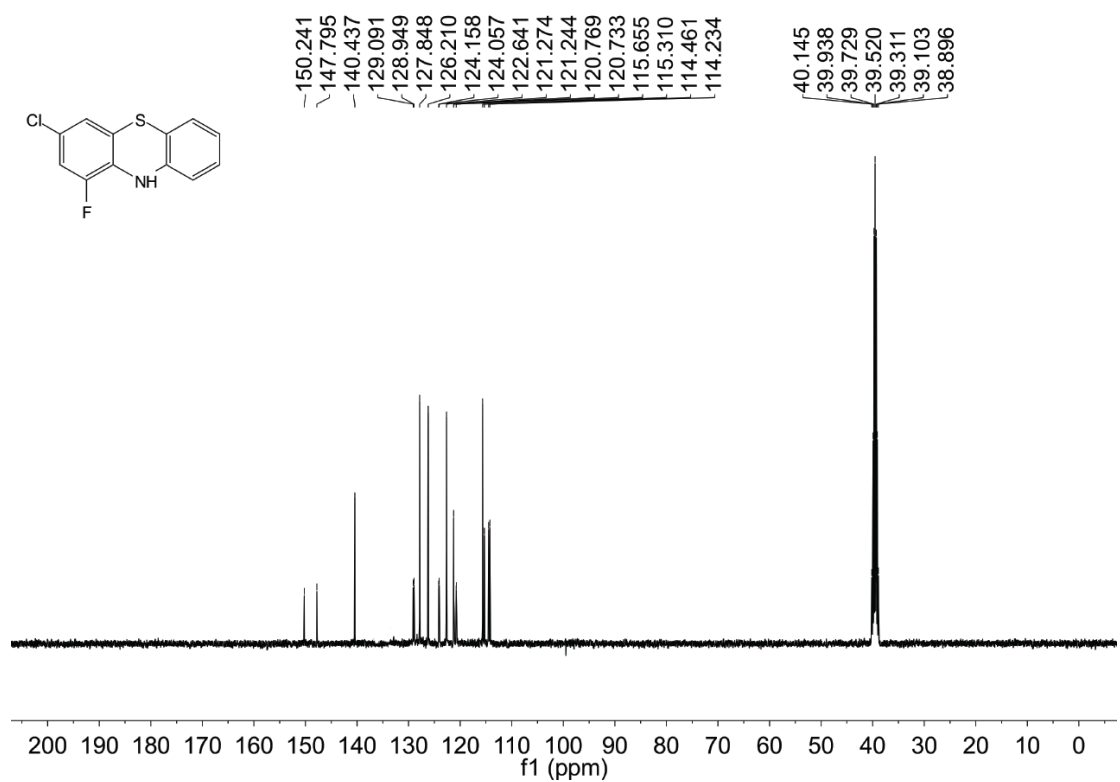

<sup>1</sup>H NMR and <sup>13</sup>C NMR of Compound 3r

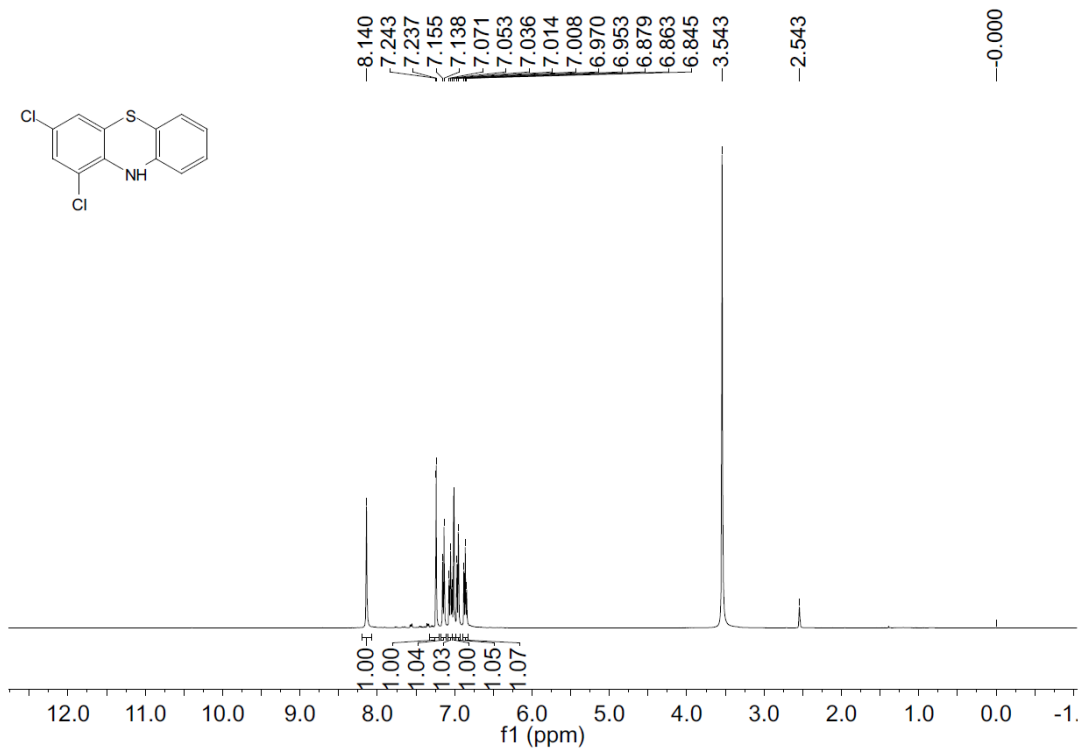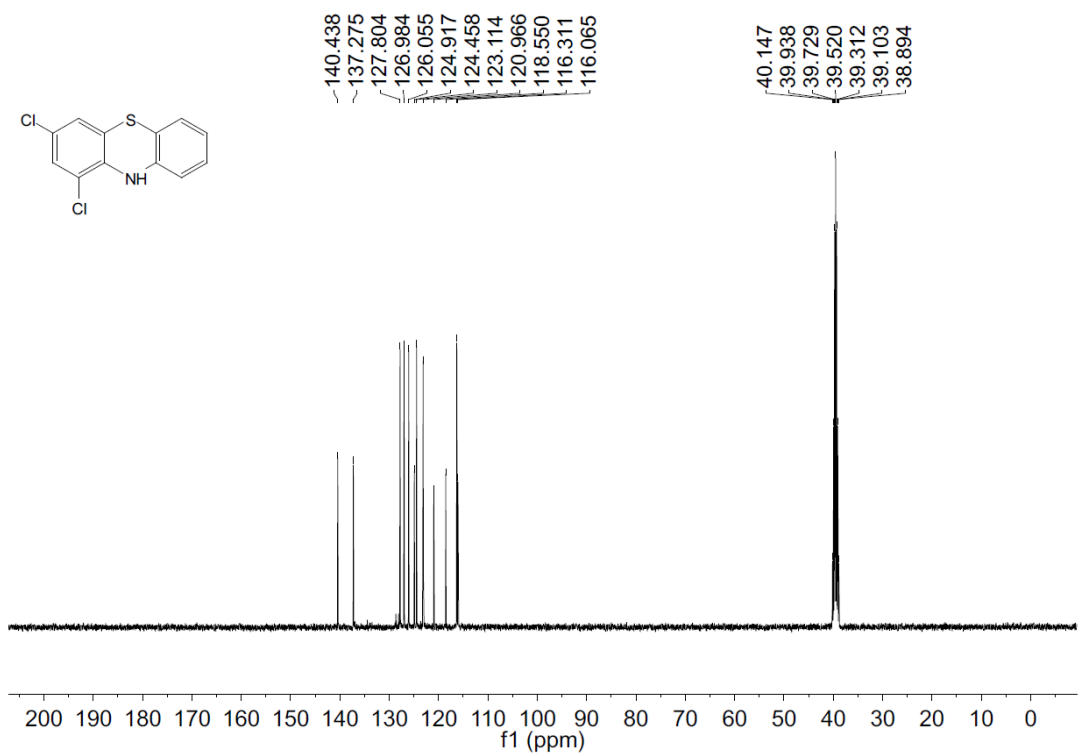

$^1\text{H}$  NMR and  $^{13}\text{C}$  NMR of Compound **3s**

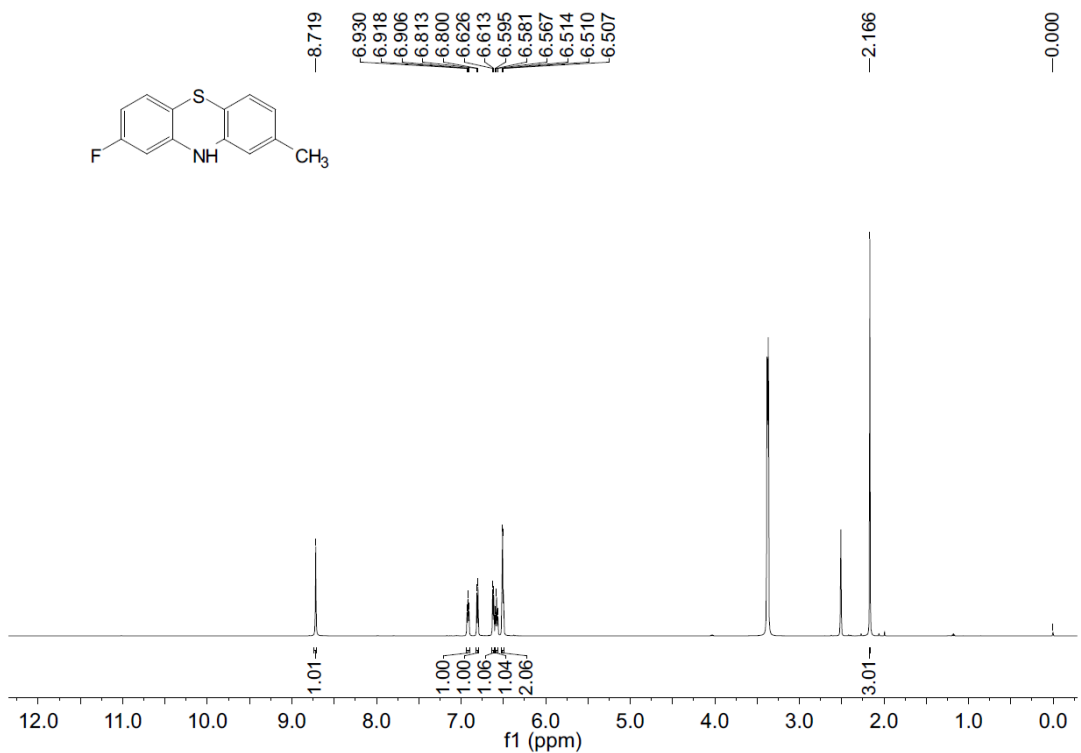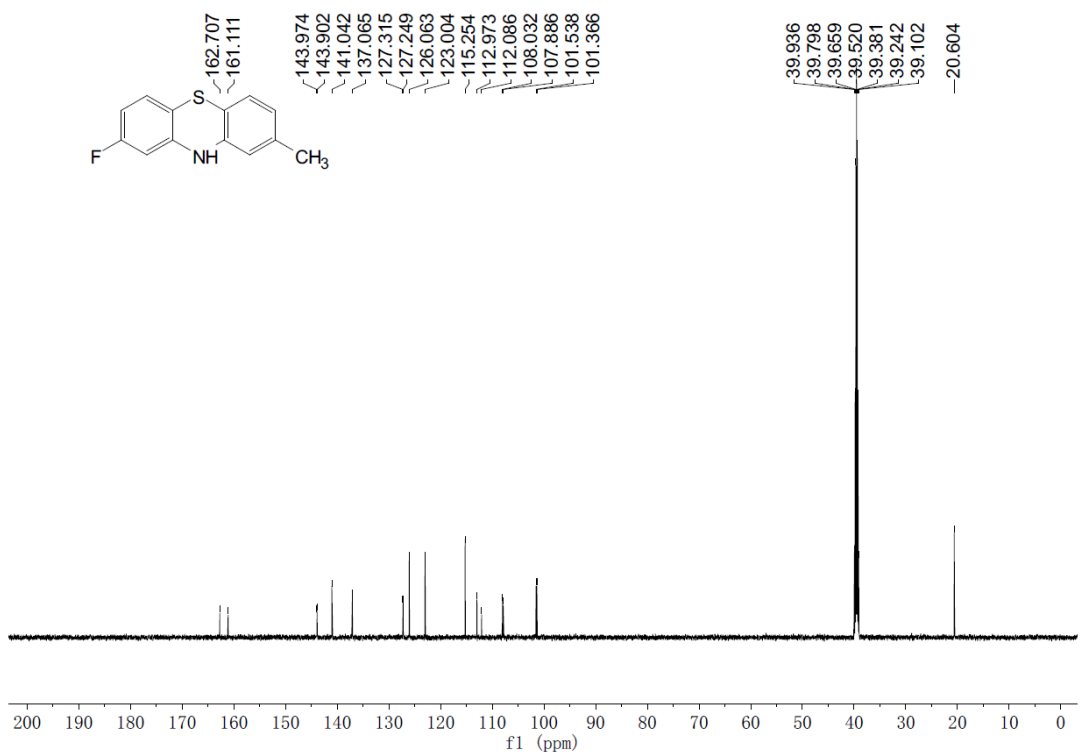

<sup>1</sup>H NMR and <sup>13</sup>C NMR of Compound 3t

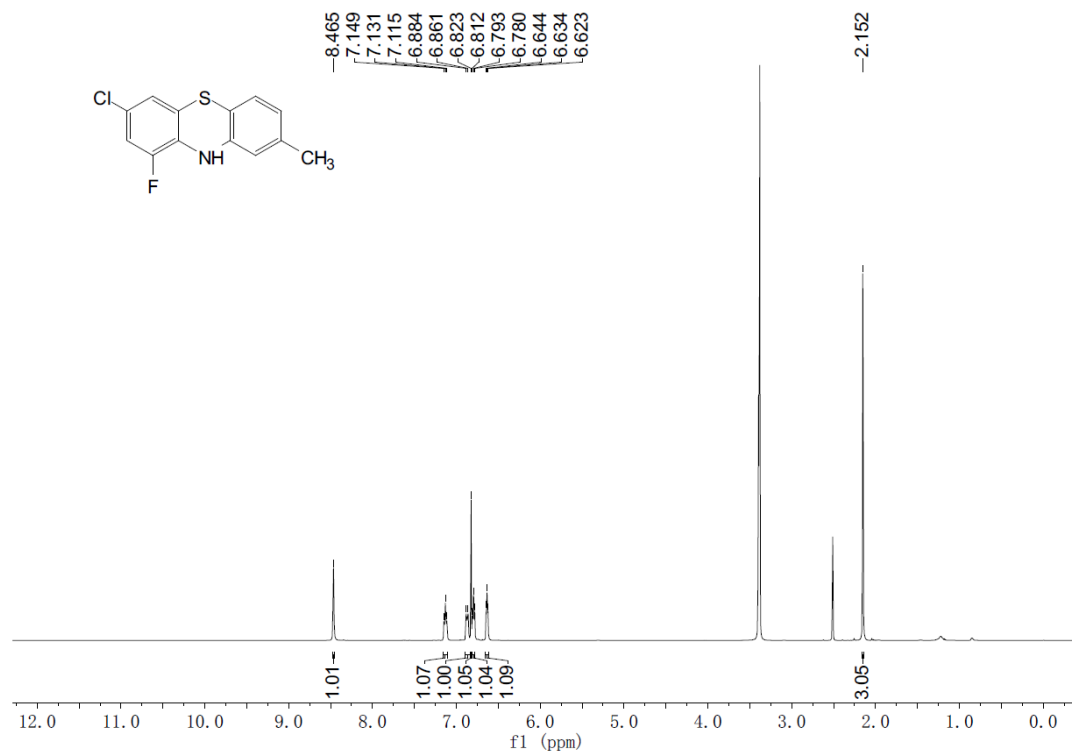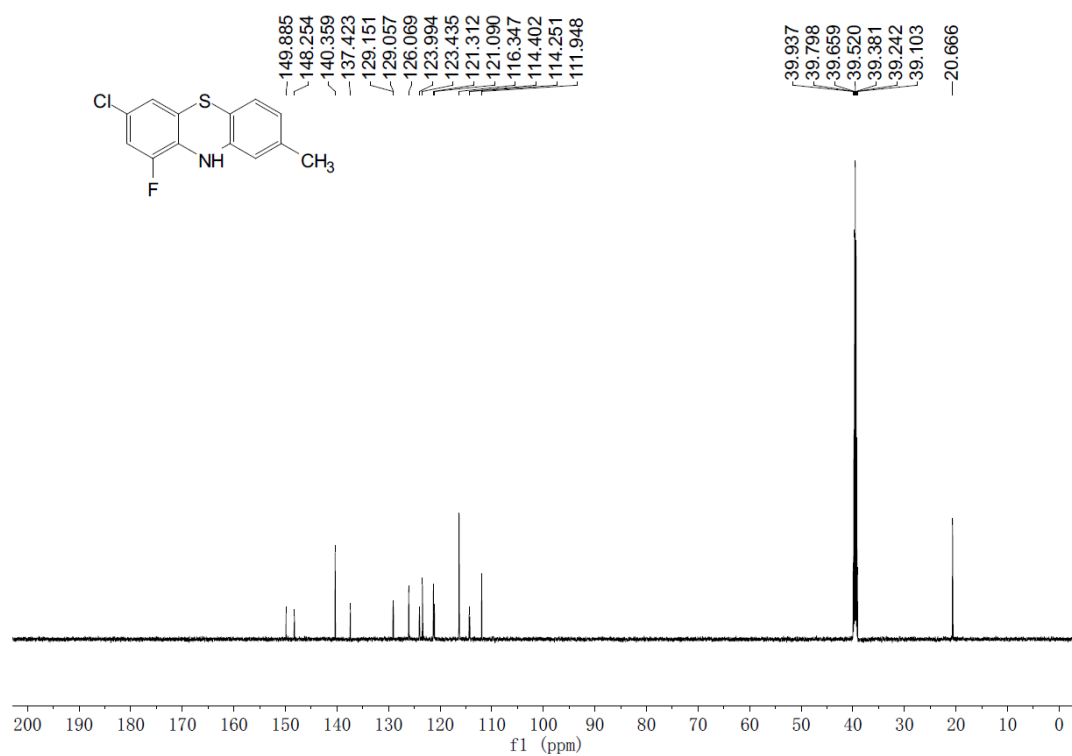

**<sup>1</sup>H NMR and <sup>13</sup>C NMR of Compound 3u**

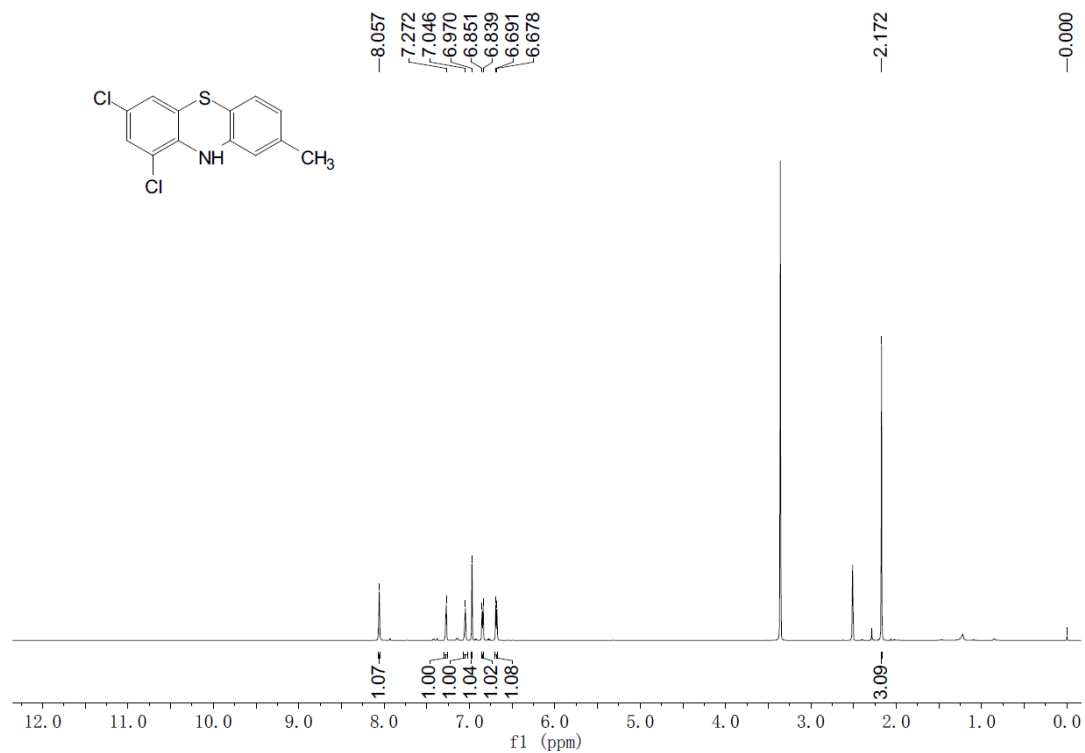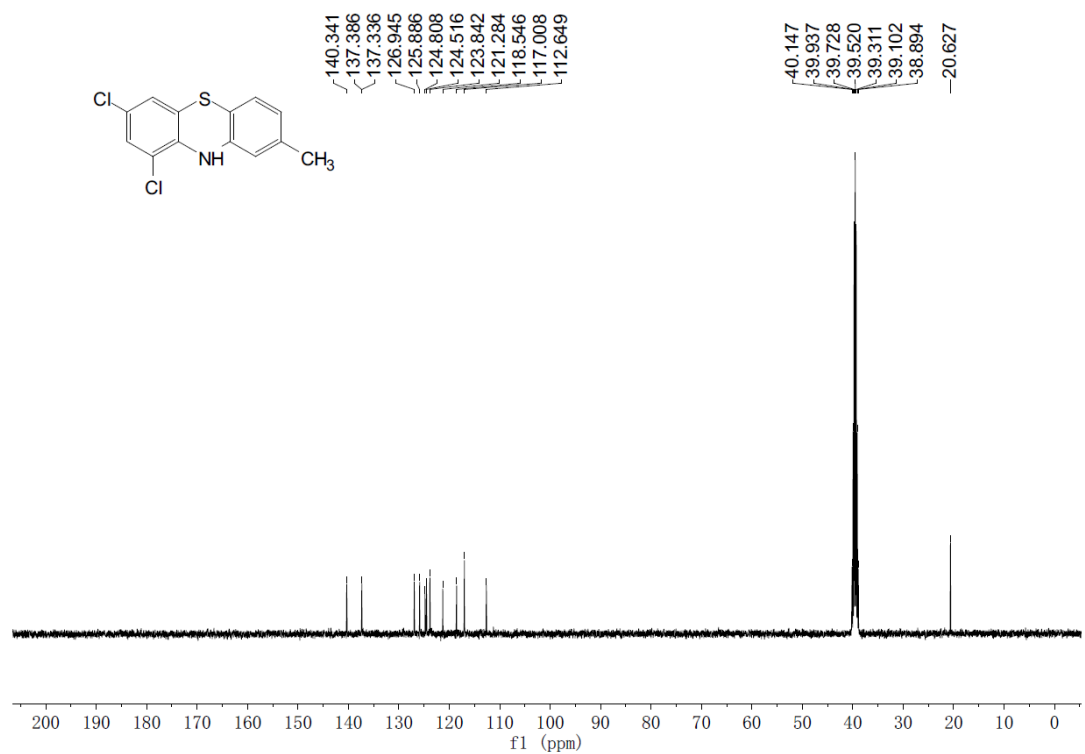

$^1\text{H NMR}$  and  $^{13}\text{C NMR}$  of Compound 3v

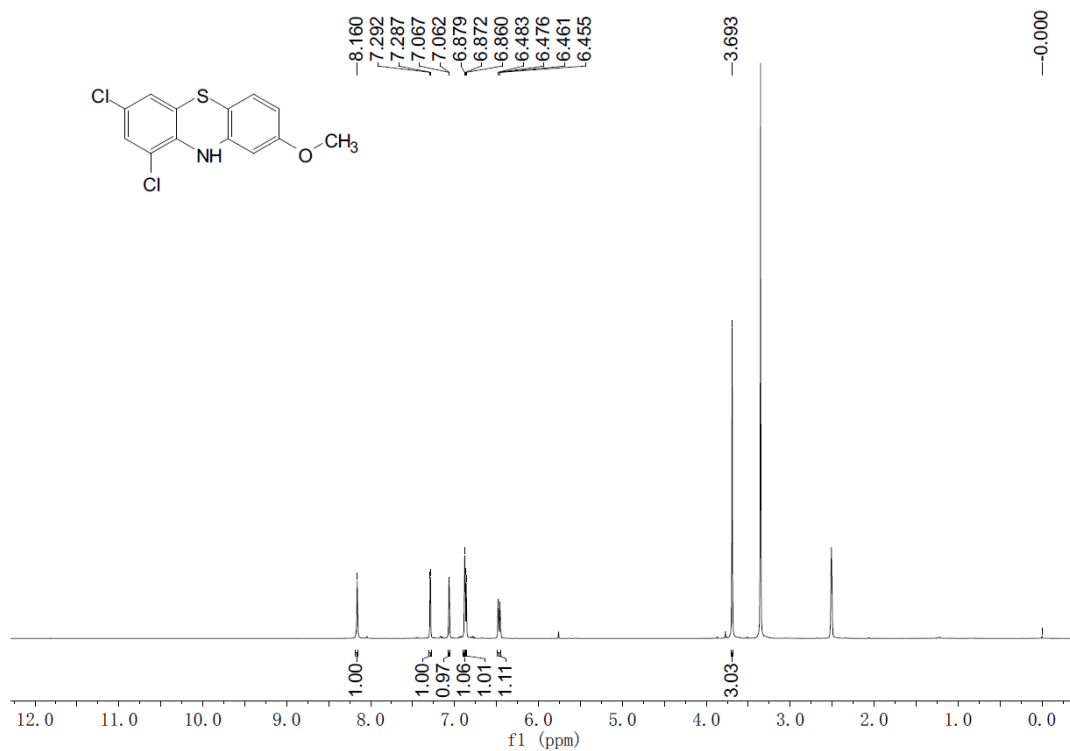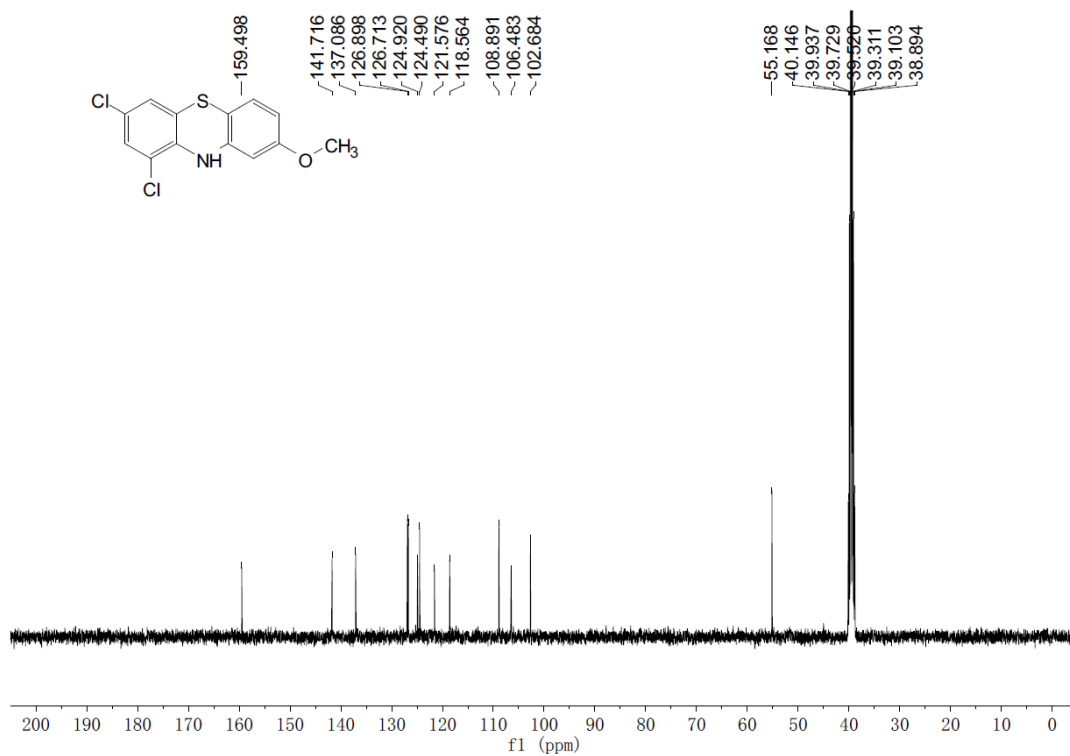

<sup>1</sup>H NMR and <sup>13</sup>C NMR of Compound **3w**



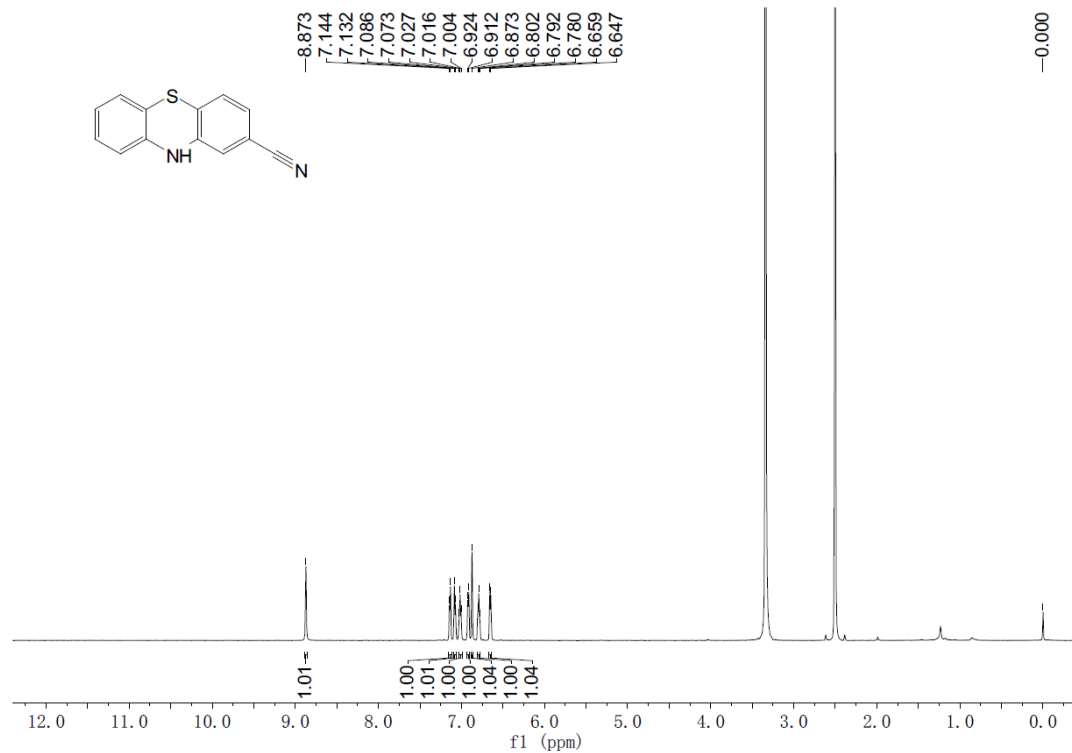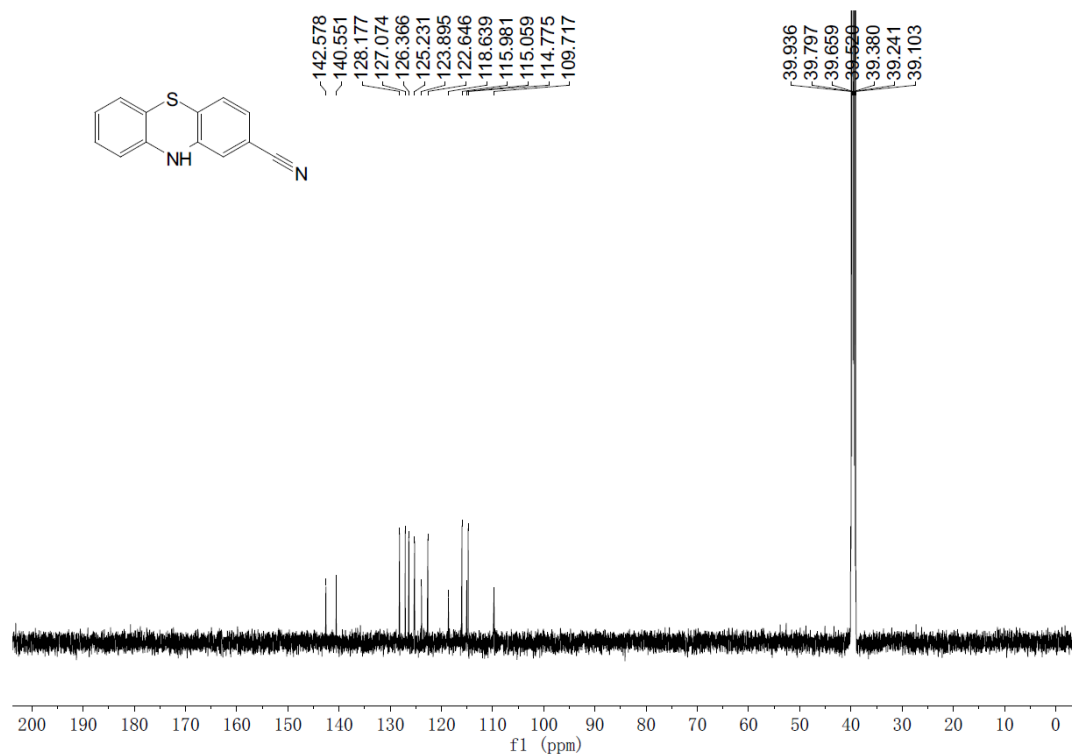

<sup>1</sup>H NMR and <sup>13</sup>C NMR of Compound 3x

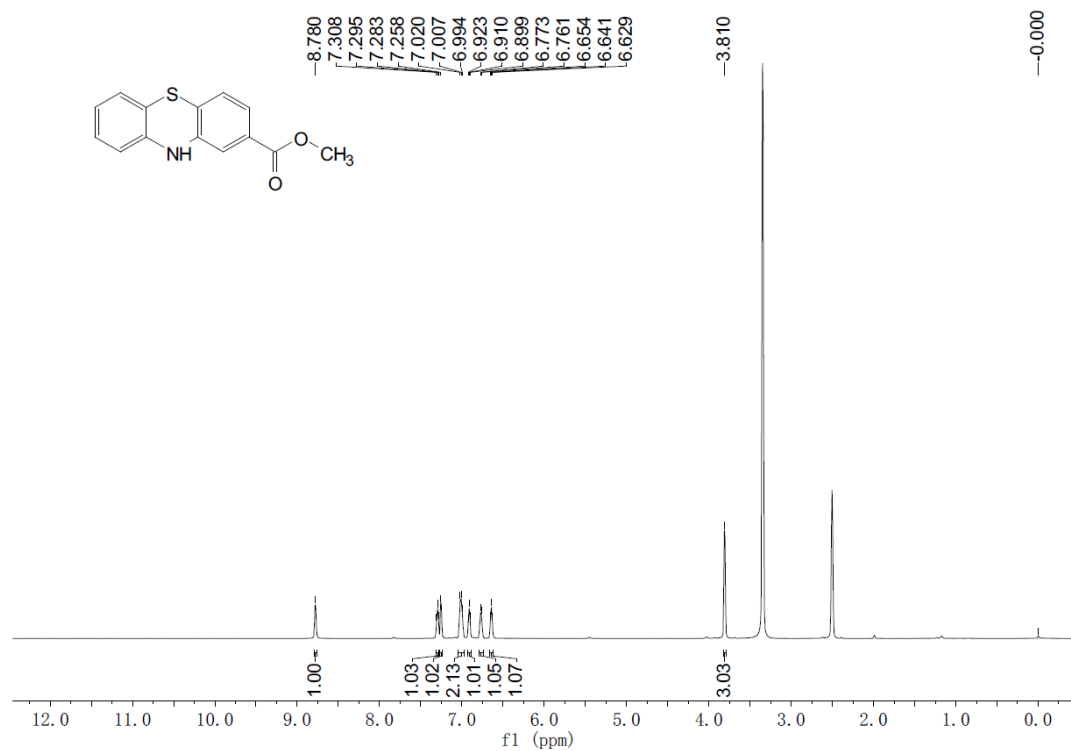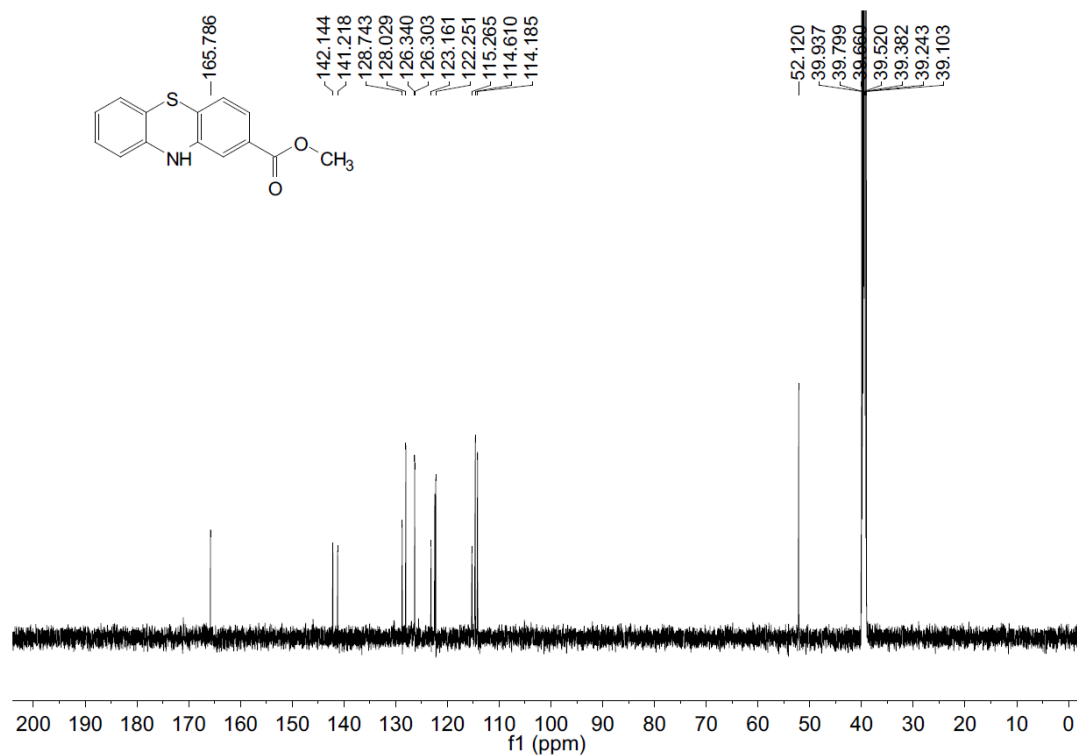

<sup>1</sup>H NMR and <sup>13</sup>C NMR of Compound **3y**
